# Supplementary material
Source: PubMed Central journal article supplement (PMC10125632)
Supplement: jasn-34-909-s001.pdf [file jasn-34-909-s001.pdf]

## **Supplementary Material Table of Contents:**

Supplementary Table 1: Model characteristic used for gene- and gene-set based collapsing analyses. Max minor allele frequency (MAF) imposed using gnomAD and ExAC as references across six genetic ancestries: African, American, Non-Finnish European, Finnish, East Asian, and South Asian. Internal max MAF uses the full IGM sequence database as reference.

Supplementary Table 2: Gene names used for gene-set analyses.

Supplementary Table 3: Novel APOL1 variants identified.

Supplementary Table 4: Expanded demographics and baseline data of included CKD patients, divided by APOL1 risk genotype, including single risk allele carriers and specific high-risk genotypes.

Supplementary Table 5: Monogenic kidney diseases identified within the study. Includes variant classification, and criteria asserted.

Supplementary Table 6: Top 15 ranked genes across the rare-variant collapsing analysis. Clinical group shows the specific phenotype in which the signal was seen, with the inheritance model showing the specific parameters of included qualifying variants for the signal. For cells with 0 counts, these were replaced with a 1 to calculate a minimum OR, signified by a > sign.

Supplementary Table 7: Top results of the common and rare variant secondary gene-based burden analysis. Gene, functional effect, and maximum minor allele frequency (AF) cut-off compose a single mask, used for calculation of enrichment and P-value using fast Firth approximation.

Supplementary Table 8: Results from the gene-set based rare-variant collapsing analysis.

Supplementary Table 9: Qualifying variants identified within the inflammasome gene-set within the dominant rare missense model for the full cohort.

Supplementary Figure 1: Genetic ancestry and clustering using principal components analyses of exome ancestry markers on a UMAP projection. Panel A shows genetic ancestry clusters by predicted ethnicity. Panel B shows the same genetic ancestry clusters by APOL1 risk genotype of included samples and those that were excluded by genetic ancestry-matching. The majority of included samples have a predicted genetic ancestry of African or Hispanic.

Supplementary Figure 2: Lifetime risk of the development of kidney failure comparing subjects with specific high-risk APOL1 genotypes to low-risk APOL1 genotype. Median time to kidney failure denoted and global Logrank P-value shown.

Supplementary Figure 3: eGFR change over time in subjects by specific APOL1 genotype. eGFR decline rate calculated with covariates held at mean values. Adjusted for primary cause of kidney disease, family history of kidney disease, diabetes mellitus, hypertension, genetic ancestry cluster, and initial measured eGFR.

Supplementary Figure 4: Lifetime risk of developing kidney failure for the interaction between APOL1 high-risk genotype and primary cause of kidney disease. Cox proportional hazard models applied to 1426 CKD patients. Analyses included the main effect of APOL1 risk genotype which remained significant in each model. Cox models were adjusted for family history of kidney disease, sex, ZIP code based median income, genetic ancestry cluster, Elixhauser comorbidity score, diabetes mellitus and hypertension.

Supplementary Figure 5: eGFR change over time in subjects characterized by number of APOL1 risk alleles. eGFR decline rate calculated with covariates held at mean values. Adjusted for primary cause of kidney disease, family history of kidney disease, diabetes mellitus, hypertension, genetic ancestry cluster, and initial measured eGFR.

Supplementary Methods.

Supplementary Table 1: Model characteristic used for gene- and gene-set based collapsing analyses. Max minor allele frequency (MAF) imposed using gnomAD and ExAC as references across six genetic ancestries: African, American, Non-Finnish European, Finnish, East Asian, and South Asian. Internal max MAF uses the full IGM sequence database as reference.

| Model Name                           | Variant Type                   | max MAF | Internal max MAF | Pathogenicity Filter<br>(Polyphen-2 HumVar) | Regional Intolerance Filter |
|--------------------------------------|--------------------------------|---------|------------------|---------------------------------------------|-----------------------------|
| Dominant Rare Missense               | Missense                       | 0.05%   | 0.10%            | Probably, Possibly, Unknown, Benign         | None                        |
| Dominant Rare Missense MTR           | Missense                       | 0.05%   | 0.10%            | Probably, Possibly, Unknown, Benign         | MTR ≤50%                    |
| Dominant Rare Missense LIMBR         | Missense                       | 0.05%   | 0.10%            | Probably, Possibly, Unknown, Benign         | LIMBR ≤50%                  |
| Dominant Rare Not Benign             | PTV + Missense + inframe indel | 0.05%   | 0.10%            | Probably, Possibly, Unknown                 | None                        |
| Dominant Rare Not Benign MTR         | PTV + Missense + inframe indel | 0.05%   | 0.10%            | Probably, Possibly, Unknown                 | MTR ≤50%                    |
| Dominant Rare Not Benign LIMBR       | PTV + Missense + inframe indel | 0.05%   | 0.10%            | Probably, Possibly, Unknown                 | LIMBR ≤50%                  |
| Dominant Rare PTV                    | PTV                            | 0.10%   | 0.10%            | NA                                          | NA                          |
| Dominant Ultra Rare Deleterious      | PTV + Missense + inframe indel | 0       | 0.05%            | Probably                                    | None                        |
| Dominant Ultra Rare Not Benign       | PTV + Missense + inframe indel | 0       | 0.05%            | Probably, Possibly, Unknown                 | None                        |
| Dominant Ultra Rare Not Benign MTR   | PTV + Missense + inframe indel | 0       | 0.05%            | Probably, Possibly, Unknown                 | MTR ≤50%                    |
| Dominant Ultra Rare Not Benign LIMBR | PTV + Missense + inframe indel | 0       | 0.05%            | Probably, Possibly, Unknown                 | LIMBR ≤50%                  |
| Recessive Non-synonymous             | PTV + Missense + inframe indel | 1.00%   | 1.00%            | Probably, Possibly, Unknown, Benign         | None                        |
| Dominant Synonymous                  | Synonymous                     | 0.05%   | 0.10%            | NA                                          | None                        |
| Recessive Synonymous                 | Synonymous                     | 1.00%   | 1.00%            | NA                                          | None                        |

Abbreviations: PTV = Protein Truncating Variant, MTR = Missense Tolerance Ratio, LIMBR = Localized Intolerance Model using Bayesian Regression.

Max MAF is applied across the seven genetic ancestries from gnomAD: African, American, Ashkenazi Jewish, East Asian, South Asian, Finnish European, Non-Finnish European; and 6 from ExAC: African, American, Non-Finnish European, Finnish European, East Asian, South Asian.

Supplementary Table 2: Gene names used for gene-set analyses.

| Pyroptosis Pathway | Inflammasome Pathway | Autosomal Recessive<br>Kidney Genes (part 1) | Autosomal Recessive<br>Kidney Genes (part 2) | Autosomal Recessive<br>Kidney Genes (part 3) | Autosomal Recessive<br>Kidney Genes (part 4) | Autosomal Recessive<br>Kidney Genes (part 5) |
|--------------------|----------------------|----------------------------------------------|----------------------------------------------|----------------------------------------------|----------------------------------------------|----------------------------------------------|
| AIM2               | AIM2                 | ABCC6                                        | CLDN19                                       | FLNB                                         | NARS2                                        | SCARB2                                       |
| APIP               | CARD8                | ABCD4                                        | COL18A1                                      | FRAS1                                        | NBN                                          | SCNN1A                                       |
| CASP1              | CASP1                | ACE                                          | COL4A4                                       | FREM2                                        | NECTIN1                                      | SCO1                                         |
| CASP4              | CASP4                | ACP5                                         | COQ2                                         | G6PC                                         | NEK1                                         | SDCCAG8                                      |
| CASP6              | CASP5                | ADAMTS13                                     | COQ6                                         | GALNT3                                       | NEK8                                         | SERPINH1                                     |
| CASP8              | DDX3X                | AGPAT2                                       | COQ7                                         | GBA                                          | NHP2                                         | SI                                           |
| DHX9               | DHX33                | AGT                                          | COQ8B                                        | GCDH                                         | NPHP1                                        | SLC12A1                                      |
| ELANE              | GSDMD                | AGTR1                                        | COQ9                                         | GLB1                                         | NPHP3                                        | SLC12A3                                      |
| GSDMA              | MEFV                 | AGXT                                         | COX10                                        | GLIS2                                        | NPHP4                                        | SLC1A1                                       |
| GSDMB              | NAIP                 | AHI1                                         | COX14                                        | GLIS3                                        | NPHS1                                        | SLC22A12                                     |
| GSDMC              | NLR4                 | ALG8                                         | COX20                                        | GRHR                                         | NPHS2                                        | SLC25A1                                      |
| GSDMD              | NLRP1                | ALG9                                         | COX6B1                                       | GRIP1                                        | NUP107                                       | SLC26A4                                      |
| GSDME              | NLRP3                | ALMS1                                        | COX8A                                        | HBB                                          | NUP205                                       | SLC2A10                                      |
| GZMA               | NLRP6                | AMN                                          | CPT1A                                        | HES7                                         | NUP93                                        | SLC2A2                                       |
| GZMB               | NLRP9                | ANKS6                                        | CPT2                                         | HGD                                          | OCLN                                         | SLC34A1                                      |
| NAIP               | PYCARD               | APC2                                         | CRB2                                         | HOGA1                                        | OPLAH                                        | SLC34A3                                      |
| NLR4               |                      | APOPT1                                       | CRTP                                         | HPS1                                         | PAF1                                         | SLC37A4                                      |
| NLRP1              |                      | APRT                                         | CSP1                                         | HPSE2                                        | PALB2                                        | SLC4A4                                       |
| NLRP6              |                      | ARHGDI1                                      | CTC1                                         | HSD11B2                                      | PC                                           | SLC7A7                                       |
| NLRP9              |                      | ARL13B                                       | CTNS                                         | HSD17B3                                      | PDE6D                                        | SLC9A3R1                                     |
| TREM2              |                      | ARL6                                         | CUBN                                         | HSD17B4                                      | PDSS1                                        | SLX4                                         |
| ZBP1               |                      | ARNT2                                        | CYP11B1                                      | HSD3B2                                       | PDSS2                                        | SMARCAL1                                     |
|                    |                      | ATP6V0A4                                     | CYP17A1                                      | HSPA9                                        | PET100                                       | SMOC1                                        |
|                    |                      | ATP6V1B1                                     | CYP21A2                                      | HSPG2                                        | PEX1                                         | SPINT2                                       |
|                    |                      | ATP7B                                        | CYP24A1                                      | HYLS1                                        | PEX10                                        | STAR                                         |
|                    |                      | AUH                                          | DCDC2                                        | ICK                                          | PEX11B                                       | STRA6                                        |
|                    |                      | B3GLCT                                       | DCHS1                                        | IFT122                                       | PEX12                                        | STRADA                                       |
|                    |                      | B4GAT1                                       | DDX59                                        | IFT140                                       | PEX13                                        | STUB1                                        |
|                    |                      | B9D1                                         | DGKE                                         | IFT172                                       | PEX14                                        | SUCLA2                                       |
|                    |                      | B9D2                                         | DHCR7                                        | IFT27                                        | PEX16                                        | SUGCT                                        |
|                    |                      | BBIP1                                        | DIS3L2                                       | IFT43                                        | PEX19                                        | TACO1                                        |
|                    |                      | BBS1                                         | DLL3                                         | IFT80                                        | PEX2                                         | TAPT1                                        |
|                    |                      | BBS10                                        | DMP1                                         | IKBKAP                                       | PEX26                                        | TBC1D20                                      |
|                    |                      | BBS12                                        | DNA2                                         | INPP5E                                       | PEX3                                         | TBC1D24                                      |
|                    |                      | BBS2                                         | DNAAF1                                       | INPL1                                        | PEX5                                         | TBCE                                         |
|                    |                      | BBS4                                         | DNASE1L3                                     | INSR                                         | PEX6                                         | TCTN2                                        |
|                    |                      | BBS5                                         | DNMT3B                                       | INVS                                         | PGM3                                         | TCTN3                                        |
|                    |                      | BBS7                                         | DPH1                                         | IQCB1                                        | PHGDH                                        | THOC6                                        |
|                    |                      | BBS9                                         | DYNC2H1                                      | ITGA3                                        | PIGL                                         | TMCO1                                        |
|                    |                      | BCS1L                                        | EFEMP2                                       | ITGA6                                        | PIGN                                         | TMEM138                                      |
|                    |                      | BMPER                                        | EGF                                          | ITGA8                                        | PIGT                                         | TMEM216                                      |
|                    |                      | BRIP1                                        | EIF2AK3                                      | ITGB4                                        | PKHD1                                        | TMEM231                                      |
|                    |                      | BSCL2                                        | EIF2B4                                       | JAM3                                         | PLCE1                                        | TMEM237                                      |
|                    |                      | BSND                                         | EMP2                                         | KANK1                                        | PLG                                          | TMEM67                                       |
|                    |                      | BUB1B                                        | ENPP1                                        | KANK2                                        | PLOD1                                        | TMEM70                                       |
|                    |                      | C1QA                                         | EPG5                                         | KANK4                                        | PMM2                                         | TRAF3IP1                                     |
|                    |                      | C1QB                                         | ERBB3                                        | KCNJ1                                        | PNPLA6                                       | TRAI1                                        |
|                    |                      | C1QC                                         | ERCC4                                        | KCNJ10                                       | POMC                                         | TRAP1                                        |
|                    |                      | C2                                           | ERCC6                                        | KIF14                                        | POMT1                                        | TRIM32                                       |
|                    |                      | C3                                           | ERCC8                                        | KIF7                                         | POR                                          | TRMT5                                        |
|                    |                      | C4A                                          | ESCO2                                        | KL                                           | PPP1R15B                                     | TRNT1                                        |
|                    |                      | C5orf42                                      | ETFA                                         | KYNU                                         | PRKCD                                        | TRPM6                                        |
|                    |                      | CA2                                          | ETFB                                         | LAMB2                                        | PRODH                                        | TTC21B                                       |
|                    |                      | CAD                                          | ETFDH                                        | LAMB3                                        | PSAP                                         | TTC37                                        |
|                    |                      | CC2D2A                                       | EVC                                          | LAMC2                                        | PTPRO                                        | TTC8                                         |
|                    |                      | CCBE1                                        | EVC2                                         | LARS                                         | PYGM                                         | TXNL4A                                       |
|                    |                      | CD151                                        | FAH                                          | LCAT                                         | RAB18                                        | UBE2T                                        |
|                    |                      | CD19                                         | FAM20A                                       | LDHA                                         | RAB23                                        | UBR1                                         |
|                    |                      | CD81                                         | FAM20C                                       | LFNG                                         | RAB3GAP1                                     | UMPS                                         |
|                    |                      | CD96                                         | FAN1                                         | LMBRD1                                       | RAB3GAP2                                     | UPB1                                         |
|                    |                      | CECR1                                        | FANCA                                        | LONP1                                        | RAD51C                                       | UQCC2                                        |
|                    |                      | CENPF                                        | FANCC                                        | LPIN1                                        | RBBP8                                        | VIPAS39                                      |
|                    |                      | CEP104                                       | FANCD2                                       | LRIG2                                        | RBM8A                                        | VPS33B                                       |
|                    |                      | CEP120                                       | FANCE                                        | LRP2                                         | RECQL4                                       | WDPCP                                        |
|                    |                      | CEP164                                       | FANCF                                        | LRP4                                         | RET                                          | WDR19                                        |
|                    |                      | CEP290                                       | FANCG                                        | LTBP4                                        | RIN2                                         | WDR34                                        |
|                    |                      | CEP41                                        | FANCI                                        | LZTFL1                                       | RIPK4                                        | WDR35                                        |
|                    |                      | CEP83                                        | FANCL                                        | MEFV                                         | RIPPLY2                                      | WDR60                                        |
|                    |                      | CFH                                          | FANCM                                        | MESP2                                        | RMND1                                        | WDR73                                        |
|                    |                      | CFI                                          | FASTKD2                                      | MKKS                                         | RNU4ATAC                                     | WNT3                                         |
|                    |                      | CHRM3                                        | FAT4                                         | MKS1                                         | ROR2                                         | WNT7A                                        |
|                    |                      | CHST14                                       | FBLN5                                        | MMACHC                                       | RPGRI1                                       | XDH                                          |
|                    |                      | CISD2                                        | FBXL4                                        | MRPS22                                       | RRM2B                                        | XPNPEP3                                      |
|                    |                      | CLCNKA                                       | FGF20                                        | MUT                                          | RTTN                                         | XRCC4                                        |
|                    |                      | CLCNKB                                       | FGFR1                                        | MVK                                          | SARS2                                        | XYLT2                                        |
|                    |                      | CLDN16                                       | FKBP14                                       | MYO1E                                        | SBDS                                         | ZAP70                                        |
|                    |                      |                                              |                                              |                                              | SC5D                                         | ZMPSTE24                                     |

Supplementary Table 3: Novel *APOL1* variants identified.

| Variant ID         | HGVS_c          | HGVS_p                | <i>APOL1</i> Risk Genotype | SRA Domain | Number of Individuals |
|--------------------|-----------------|-----------------------|----------------------------|------------|-----------------------|
| 22-36653390-A-G    | c.124A>G        | p.Thr42Ala            | Low-risk                   | No         | 2                     |
| 22-36653403-A-G    | c.137A>G        | p.Asp46Gly            | Low-risk                   | No         | 2                     |
| 22-36653423-G-A    | c.157G>A        | p.Gly53Ser            | Low-risk                   | No         | 2                     |
| 22-36657720-C-T    | c.266C>T        | p.Thr89Ile            | Low-risk                   | No         | 1                     |
| 22-36661201-G-A    | c.319G>A        | p.Glu107Lys           | Low-risk                   | No         | 1                     |
| 22-36661272-CGA-C  | c.391_392delGA  | p.Asp131fs            | Low-risk                   | No         | 1                     |
| 22-36661274-A-ATTT | c.393_394insTTT | p.Asp131_Lys132insPhe | Low-risk                   | No         | 1                     |
| 22-36661772-C-T    | c.890C>T        | p.Pro297Leu           | Low-risk                   | No         | 1                     |
| 22-36661812-C-G    | c.930C>G        | p.Ile310Met           | Low-risk                   | No         | 1                     |
| 22-36661849-G-C    | c.967G>C        | p.Glu323Gln           | Low-risk                   | No         | 1                     |
| 22-36662017-G-A    | c.1135G>A       | p.Glu379Lys           | Low-risk                   | Yes        | 1                     |
| 22-36662032-A-T    | c.1150A>T       | p.Ile384Phe           | Low-risk                   | Yes        | 1                     |
| 22-36662039-A-G    | c.1157A>G       | p.Asn386Ser           | Low-risk                   | Yes        | 1                     |

Supplementary Table 4: Expanded demographics and baseline data of included CKD patients, divided by APOL1 risk genotype, including single risk allele carriers and specific high-risk genotypes.

|                                                             | Low-Risk<br>Genotype | Single Risk Allele<br>G1 or G2 | High-Risk<br>Genotype | G1/G1              | G2/G2              | G1/G2              |
|-------------------------------------------------------------|----------------------|--------------------------------|-----------------------|--------------------|--------------------|--------------------|
| Number                                                      | 1187                 | 336                            | 239                   | 98                 | 32                 | 109                |
| Biologic Sex, Female (%)                                    | 564 (48%)            | 170 (51%)                      | 105 (44%)             | 47 (48%)           | 9 (28%)            | 51 (45%)           |
| Age at recruitment, years median (IQR)                      | 43.7 (27.9 – 57.8)   | 46.7 (32.1 – 58.6)             | 43.4 (30.2 – 54.6)    | 43.0 (32.8 – 52.8) | 44.4 (37.1 – 58.2) | 43.3 (28.8 – 54.8) |
| Age at last followup, years median (IQR)                    | 48.4 (32.1 – 62.2)   | 51.0 (36.5 – 62.2)             | 48.8 (35.9 – 59.3)    | 49.4 (37.7 – 56.5) | 49.9 (38.6 – 62.6) | 47.9 (34.9 – 60.1) |
| Follow-up time, years median (IQR)                          | 3.7 (0 – 6.1)        | 3.5 (0 – 6.2)                  | 3.7 (0 – 7.1)         | 3.1 (0 – 7.1)      | 3.2 (0–6.7)        | 4.7 (1.5 – 7.2)    |
| Pediatric at recruitment (%)                                | 149 (13%)            | 27 (8%)                        | 4 (2%)                | 3 (3%)             | 0 (0%)             | 0 (0%)             |
| Developed Kidney Failure (%)                                | 630 (53%)            | 198 (59%)                      | 168 (70%)             | 73 (74%)           | 21 (66%)           | 74 (68%)           |
| Age at Kidney Failure, years median (IQR)                   | 43.3 (30.5 – 55.4)   | 44.8 (30.7 – 55.3)             | 40.6 (28.0 – 50.2)    | 40.5 (29.4 – 48.9) | 41.5 (28.4 – 53.4) | 40.8 (27.9 – 49.9) |
| Received Kidney Transplant (%)                              | 538 (45%)            | 163 (49%)                      | 150 (63%)             | 68 (69%)           | 18 (56%)           | 64 (59%)           |
| Family History of Kidney Disease (%)                        | 399 (34%)            | 108 (32%)                      | 83 (35%)              | 37 (38%)           | 12 (38%)           | 35 (32%)           |
| Initial eGFR, mL/min/1.73m <sup>2</sup> mean (IQR)          | 57.9 (33.2 – 97.6)   | 58.7 (34.6 – 86.3)             | 49.7 (34.5 – 81.7)    | 53.5 (31.8 – 90.4) | 45.0 (19.4 – 67.7) | 49.7 (34.7 – 81.7) |
| Self-Described Race and ethnicity                           |                      |                                |                       |                    |                    |                    |
| Asian, Hispanic or Latinx                                   | 3 (0.2%)             | 1 (0.3%)                       | 0 (0%)                | 0 (0%)             | 0 (0%)             | 0 (0%)             |
| Asian, Not Hispanic or Latinx                               | 5 (0.4%)             | 1 (0.3%)                       | 1 (0.4%)              | 1 (1%)             | 0 (0%)             | 0 (0%)             |
| Black/African American, Hispanic or Latinx                  | 70 (6%)              | 25 (7%)                        | 14 (6%)               | 11 (11%)           | 1 (3%)             | 2 (2%)             |
| Black/African American, Not Hispanic or Latinx              | 294 (25%)            | 148 (44%)                      | 149 (61%)             | 68 (69%)           | 20 (63%)           | 61 (56%)           |
| Black/African American, Unspecified Ethnicity               | 5 (0.4%)             | 2 (0.6%)                       | 2 (1%)                | 1 (1%)             | 0 (0%)             | 1 (1%)             |
| Native American, Hispanic or Latinx                         | 3 (0.2%)             | 1 (0.3%)                       | 0 (0%)                | 0 (0%)             | 0 (0%)             | 0 (0%)             |
| Unknown or preferred not to specify, Hispanic or Latinx     | 265 (22%)            | 49 (15%)                       | 16 (7%)               | 4 (4%)             | 3 (9%)             | 9 (8%)             |
| Unknown or preferred not to specify, Not Hispanic or Latinx | 41 (3%)              | 14 (4%)                        | 1 (0.4%)              | 0 (0%)             | 0 (0%)             | 1 (1%)             |
| Unknown or preferred not to specify, Unspecified Ethnicity  | 4 (0.3%)             | 1 (0.3%)                       | 0 (0%)                | 0 (0%)             | 0 (0%)             | 0 (0%)             |
| White, Hispanic or Latinx                                   | 428 (36%)            | 79 (24%)                       | 41 (17%)              | 10 (10%)           | 7 (22%)            | 24 (22%)           |
| White, Not Hispanic or Latinx                               | 62 (5%)              | 13 (4%)                        | 15 (6%)               | 3 (3%)             | 1 (3%)             | 11 (10%)           |
| White, Unspecified Ethnicity                                | 7 (0.6%)             | 2 (0.6%)                       | 0 (0%)                | 0 (0%)             | 0 (0%)             | 0 (0%)             |
| Genetic Ancestry Cluster                                    |                      |                                |                       |                    |                    |                    |
| Majority Black/African American                             | 364 (31%)            | 194 (58%)                      | 170 (71%)             | 79 (81%)           | 19 (59%)           | 72 (66%)           |
| Majority Hispanic or Latinx                                 | 195 (16%)            | 17 (5%)                        | 5 (2%)                | 2 (2%)             | 0 (0%)             | 3 (3%)             |
| Admixed connecting cluster                                  | 628 (53%)            | 125 (37%)                      | 64 (27%)              | 17 (17%)           | 13 (41%)           | 34 (31%)           |
| ZIP Code Median Income (by quintile)                        |                      |                                |                       |                    |                    |                    |
| 1 (Highest)                                                 | 33 (3%)              | 11 (3%)                        | 3 (1%)                | 0 (0%)             | 1 (3%)             | 2 (2%)             |
| 2                                                           | 355 (30%)            | 108 (32%)                      | 71 (30%)              | 33 (34%)           | 10 (31%)           | 28 (26%)           |
| 3                                                           | 515 (43%)            | 139 (41%)                      | 102 (43%)             | 41 (42%)           | 14 (44%)           | 47 (43%)           |
| 4                                                           | 218 (18%)            | 63 (19%)                       | 52 (22%)              | 19 (19%)           | 7 (22%)            | 26 (24%)           |
| 5 (lowest)                                                  | 18 (2%)              | 5 (1%)                         | 3 (1%)                | 1 (1%)             | 0 (0%)             | 2 (2%)             |
| Missing                                                     | 48 (4%)              | 10 (3%)                        | 8 (3%)                | 4 (4%)             | 0 (0%)             | 4 (4%)             |
| Hypertension                                                | 452 (38%)            | 149 (44%)                      | 108 (45%)             | 39 (40%)           | 12 (38%)           | 57 (52%)           |
| Diabetes Mellitus                                           | 183 (12%)            | 55 (16%)                       | 37 (15%)              | 14 (14%)           | 2 (6%)             | 21 (19%)           |
| Elixhauser Comorbidity Score, median (IQR)                  | 5 (0 – 9)            | 5 (2 – 8)                      | 7 (4 – 8)             | 7 (2.5 – 8)        | 8 (4 – 8)          | 8 (4 – 9.75)       |
| Missing                                                     | 450 (38%)            | 134 (40%)                      | 86 (36%)              | 39 (40%)           | 12 (38%)           | 35 (32%)           |

## Supplementary Table 5: Monogenic kidney diseases identified within the study. Includes variant classification, and criteria asserted.

| Case      | APOL1 Genotype | Gene    | Variant               | DNA Change         | Protein Change     | Genotype | ACMG                             | ACMG Criteria                                                                 | Genetic Diagnosis                                                                                        | OMIM Number |
|-----------|----------------|---------|-----------------------|--------------------|--------------------|----------|----------------------------------|-------------------------------------------------------------------------------|----------------------------------------------------------------------------------------------------------|-------------|
| CKD2_0926 | High risk      | COL4A5  | X-107821341-G-T       | c.679G>T           | p.Gly227Cys        | hemi     | LP                               | PM1, PM2_sup, PM5, PP2, PP3                                                   | Alport syndrome 1, X-linked                                                                              | 301050      |
| CKD2_0947 | High risk      | PKD1    | 16-2164695-G-A        | c.2329C>T          | p.Gln777Ter        | het      | LP                               | PVS1, PM2_sup                                                                 | Polycystic kidney disease 1                                                                              | 601313      |
| CKD2_0769 | High risk      | WT1     | 11-32450048-G-T       | c.779C>A           | p.Ser260Ter        | het      | LP                               | PVS1, PM2_sup                                                                 | Denys-Drash syndrome                                                                                     | 607102      |
| CKD2_0838 | High risk      | INF2    | 14-105167956-C-T      | c.254C>T           | p.Ser85Leu         | het      | LP                               | PM1, PM2_sup, PM5, PP3                                                        | Glomerulosclerosis, focal segmental, 5                                                                   | 610982      |
| CKD2_1199 | High risk      | COL4A4  | 2-227886805-C-G       | c.4175G>C          | p.Gly1392Ala       | het      | LP                               | PM1, PM2_sup, PP2, PP3, PP4                                                   | Alport syndrome, autosomal dominant/recessive; Thin basement membrane disease                            | 203780      |
| CKD2_0452 | High risk      | CREBBP  | 16-3779210-TG-T       | c.5723del          | p.P1908Hfs*30      | het      | P                                | PVS1_strong, PS4, PM2_sup,                                                    | Rubinstein-Taybi syndrome 1                                                                              | 600140      |
| CKD2_0125 | Low risk       | PKD1    | 16-2158353-CGT-C      | c.6813_6814del     | p.Arg2272fs        | het      | LP                               | PVS1, PM2_sup                                                                 | Polycystic kidney disease 1                                                                              | 601313      |
| CKD2_1386 | Low risk       | PKD1    | 16-2156267-ACACGAGC   | c.7511_7527de      | p.Ala2504fs        | het      | LP                               | PVS1, PM2_sup                                                                 | Polycystic kidney disease 1                                                                              | 601313      |
| CKD2_0966 | Low risk       | COL4A4  | 2-228009259-AATGAGT-A | c.81_86del         | p.Leu28_1le29del   | het      | LP                               | PM2_sup, PM3_strong, PM4                                                      | Alport syndrome, autosomal dominant/recessive; Thin basement membrane disease                            | 203780      |
| CKD2_1299 | Low risk       | COL4A4  | 2-227924924-C-T       | c.2092G>A          | p.Gly698Arg        | het      | LP                               | PS4_mod, PM1, PM2_sup, PP2, PP3                                               | Alport syndrome, autosomal dominant/recessive; Thin basement membrane disease                            | 203780      |
| CKD2_1334 | Low risk       | PKD2    | 4-88929082-A-AC       | c.203dupC          | p.Ala69fs          | het      | LP                               | PVS1, PM2_sup                                                                 | Polycystic kidney disease 1                                                                              | 173910      |
| CKD2_1138 | Low risk       | COL4A4  | 2-227924284-A-AG      | c.2219dupC         | p.Val741fs         | het      | LP                               | PVS1, PM2_sup                                                                 | Alport syndrome, autosomal dominant/recessive; Thin basement membrane disease                            | 203780      |
| CKD2_0868 | Low risk       | TTC21B  | 2-166785654-A-T       | c.1377T>A          | p.Cys459Ter        | comp het | LP                               | PVS1, PM2_sup                                                                 | Nephronophthisis 12                                                                                      | 613820      |
| CKD2_0868 | Low risk       | TTC21B  | 2-166797621-G-A       | c.626C>G           | p.Pro209Leu        | comp het | P                                | PS3_sup, PS4, PM2_sup, PM3_strong,                                            | Nephronophthisis 12                                                                                      | 613820      |
| CKD2_0021 | Low risk       | PKD1    | 16-2161440-C-T        | c.3728G>A          | p.Trp1243*         | het      | LP                               | PVS1, PM2_sup                                                                 | Polycystic kidney disease 1                                                                              | 601313      |
| CKD2_0241 | Low risk       | PKHD1   | 6-51935807-T-C        | c.664A>G           | p.Ile222Val        | comp het | P                                | PS4, PM1, PM2_sup, PM3_Strong                                                 | Polycystic kidney disease 4, with or without hepatic disease                                             | 263200      |
| CKD2_0241 | Low risk       | PKHD1   | 6-51824680-G-T        | c.5895dupA         | p.Leu1966fs        | comp het | P                                | PVS1, PS4, PM2_supporting                                                     | Polycystic kidney disease 4, with or without hepatic disease                                             | 263200      |
| CKD2_0055 | Low risk       | PKHD1   | 6-51909751-CATTCACTCT | c.2711_2715+12     | p.Trp904fs         | comp het | P                                | PVS1, PM2_sup                                                                 | Polycystic kidney disease 4, with or without hepatic disease                                             | 263200      |
| CKD2_0055 | Low risk       | PKHD1   | 6-51909784-TA-T       | c.2694delT         | p.Thr89fs          | comp het | LP                               | PVS1, PM2_sup                                                                 | Polycystic kidney disease 4, with or without hepatic disease                                             | 263200      |
| CKD2_0312 | Low risk       | COL4A4  | 2-227967565-C-CT      | c.871-2_871-linsA  | het                | LP       | PVS1, PM2_sup                    | Alport syndrome, autosomal dominant/recessive; Thin basement membrane disease | 203780                                                                                                   |             |
| CKD2_0871 | Low risk       | MYH9    | 22-36702030-C-T       | c.2105G>A          | p.Arg702His        | het      | P                                | PS2, PS4, PM2_sup, PM5, PP2, PP3                                              | Macrothrombocytopenia and granulocyte inclusions with or without nephritis or sensorineural hearing loss | 155100      |
| CKD2_0634 | Low risk       | COL4A4  | 2-227924924-C-T       | c.410G>A           | p.Gly137AAsp       | het      | LP                               | PM1, PM2_supporting, PP2, PP3_Strong                                          | Alport syndrome, autosomal dominant/recessive; Thin basement membrane disease                            | 203780      |
| CKD2_0634 | Low risk       | COL4A5  | X-107920806-A-C       | c.3885A>C          | p.Gln1295His       | het      | VUS                              | PM1, PM2_supporting, PP2                                                      | Alport syndrome 1, X-linked                                                                              | 301050      |
| CKD2_1140 | Low risk       | NPHS2   | 1-179521760-G-A       | c.851C>T           | p.Ala284Val        | hom      | P                                | PS4, PM1, PM2_supporting, PM3_VeryStrong                                      | Nephrotic syndrome, type 2                                                                               | 600995      |
| CKD2_1300 | Low risk       | COL4A4  | 2-227967475-TCACTGA   | c.914_930+29d      | p.Phe306fs         | het      | LP                               | PVS1_strong, PS4, PM2_sup,                                                    | Alport syndrome, autosomal dominant/recessive; Thin basement membrane disease                            | 203780      |
| CKD2_0285 | Low risk       | COL4A4  | 2-227895270-T-TGA     | c.3861_3862insT    | p.Arg1288Serfs*1   | het      | LP                               | PM1, PM2_sup, PP2, PP3, PP4                                                   | Alport syndrome, autosomal dominant/recessive; Thin basement membrane disease                            | 203780      |
| CKD2_0014 | Low risk       | COL4A3  | 2-228124575-G-A       | c.1096G>A          | p.Gly366Arg        | het      | LP                               | PS4_mod, PM1, PM2_sup, PP2, PP3                                               | Alport syndrome, autosomal dominant/recessive; Thin basement membrane disease                            | 104200      |
| CKD2_0748 | Low risk       | PKD1    | 16-2161015-TG-T       | c.7713delC         | p.Ile2572fs        | het      | LP                               | PVS1, PM2_sup                                                                 | Polycystic kidney disease 1                                                                              | 601313      |
| CKD2_0759 | Low risk       | PKD1    | 16-2166120-C-T        | c.1723-1G>A        | het                | LP       | PVS1, PM2_sup                    | Polycystic kidney disease 1                                                   | 601313                                                                                                   |             |
| CKD2_1124 | Low risk       | PKD1    | 16-2144194-TC-T       | c.10516delG        | p.Glu3506ArgfsTer  | het      | LP                               | PVS1, PM2_sup                                                                 | Polycystic kidney disease 1                                                                              | 601313      |
| CKD2_0834 | Low risk       | PKD2    | 4-88929395-CG-C       | c.514delG          | p.Asp172fs         | het      | LP                               | PVS1, PM2_sup                                                                 | Polycystic kidney disease 1                                                                              | 173910      |
| CKD2_1142 | Low risk       | COL4A5  | X-10780123-G-C        | c.2395+1G>C        | het                | P        | PVS1, PM2_sup, PP4               | Alport syndrome 1, X-linked                                                   | 301050                                                                                                   |             |
| CKD2_1302 | Low risk       | PKD1    | 16-2161213-C-T        | c.3955G>A          | p.G1319R           | het      | LP                               | PS2, PS4_mod, PM2_sup, PP3                                                    | Polycystic kidney disease 1                                                                              | 601313      |
| CKD2_0081 | Low risk       | COL4A3  | 2-228121078-G-A       | c.953G>A           | p.Gly318Asp        | het      | LP                               | PM1, PM2_sup, PP2, PP3, PP4                                                   | Alport syndrome, autosomal dominant/recessive; Thin basement membrane disease                            | 104200      |
| CKD2_0764 | Low risk       | COL4A5  | X-10786542-G-A        | c.280AG>A          | p.Gly935Asp        | het      | LP                               | PS4_mod, PM1, PM2_sup, PP2, PP3,                                              | Alport syndrome 1, X-linked                                                                              | 301050      |
| CKD2_0249 | Low risk       | COL4A3  | 2-228148990-G-A       | c.2810G>A          | p.Gly937E          | het      | LP                               | PM1, PM2_sup, PP2, PP3, PP4                                                   | Alport syndrome, autosomal dominant/recessive; Thin basement membrane disease                            | 104200      |
| CKD2_0179 | Low risk       | SALL1   | 16-51175421-G-A       | c.3098C>T          | p.Thr1033Ile       | het      | LP                               | PVS1, PM2_sup                                                                 | Townes-Brocks syndrome 1                                                                                 | 107480      |
| CKD2_0990 | Low risk       | MCHR    | 18-58039117-G-A       | c.466C>T           | p.Q156*            | het      | P                                | PVS1, PS4, PM2_supporting                                                     | Obesity, Autosomal Dominant                                                                              | 618406      |
| CKD2_1200 | Low risk       | PKD1    | 16-2153747-C-T        | c.8311G>A          | p.Glu2771Lys       | het      | LP                               | PS4, PM2_sup, PP1_strong                                                      | Polycystic kidney disease 1                                                                              | 601313      |
| CKD2_1335 | Low risk       | MYCN    | 2-16082413-G-GC       | c.228dupC          | p.W77Lfs*8         | het      | LP                               | PVS1, PM2_sup                                                                 | Feingold syndrome 1                                                                                      | 164280      |
| CKD2_1119 | Low risk       | HNF1B   | deletion of exon 1-9  | deletion of exon 1 | deletion of exon 1 | het      | LP                               |                                                                               | Renal cysts and diabetes syndrome                                                                        | 137920      |
| CKD2_1279 | Low risk       | COL4A4  | 2-227906881-C-T       | c.3488G>A          | p.Gly1163Asp       | het      | LP                               | PM1, PM2_sup, PP2, PP3, PP4                                                   | Alport syndrome, autosomal dominant/recessive; Thin basement membrane disease                            | 203780      |
| CKD2_1044 | Low risk       | NPHS2   | 1-179521760-G-A       | c.851C>T           | p.Ala284Val        | comp het | P                                | PS3_mod, PS4, PM2_sup, PM3_VeryStrong                                         | Nephrotic syndrome, type 2                                                                               | 600995      |
| CKD2_1044 | Low risk       | NPHS2   | 1-179526214-C-T       | c.686G>A           | p.Arg229Gln        | comp het | LP                               | PS3_mod, PS4, PM2_sup, PM3_VeryStrong                                         | Nephrotic syndrome, type 2                                                                               | 600995      |
| CKD2_0800 | Low risk       | COL4A4  | 2-228004913-G-T       | c.156C>A           | p.Cys52Ter         | het      | LP                               | PVS1, PM2_sup                                                                 | Alport syndrome, autosomal dominant/recessive; Thin basement membrane disease                            | 203780      |
| CKD2_1130 | Low risk       | COL4A5  | X-107821308-G-A       | c.646G>A           | p.Gly216Arg        | hemi     | LP                               | PS4_mod, PM1, PM2_sup, PM5, PP2,                                              | Alport syndrome 1, X-linked                                                                              | 301050      |
| CKD2_0403 | Low risk       | COL4A5  | X-107821308-G-A       | c.646G>A           | p.Gly216Arg        | hemi     | LP                               | PS4_mod, PM1, PM2_sup, PM5, PP2,                                              | Alport syndrome 1, X-linked                                                                              | 301050      |
| CKD2_0401 | Low risk       | PKD2    | 4-88929395-CG-C       | c.514delG          | p.Asp172fs         | het      | P                                | PVS1, PS4_mod, PM2_sup                                                        | Polycystic kidney disease 1                                                                              | 173910      |
| CKD2_0777 | Low risk       | PKD1    | 16-2140883-A-C        | c.12003+2T>G       | het                | LP       | PVS1, PM2_sup                    | Polycystic kidney disease 1                                                   | 601313                                                                                                   |             |
| CKD2_1209 | Low risk       | COL4A3  | 2-228121078-G-A       | c.953G>A           | p.Gly318Asp        | homo     | P                                | PVS1, PS4_mod, PM2_sup, PM3_sup,                                              | Alport syndrome, autosomal dominant/recessive; Thin basement membrane disease                            | 104200      |
| CKD2_0383 | Low risk       | COL4A4  | 2-227924126-GC-G      | c.2377delG         | p.Ala793fs         | het      | LP                               | PVS1, PM2_sup                                                                 | Alport syndrome, autosomal dominant/recessive; Thin basement membrane disease                            | 203780      |
| CKD2_0383 | Low risk       | COL4A4  | 2-227907873-C-T       | c.3317G>A          | p.Gly1106Asp       | het      | LP                               | PM1, PM2_sup, PP2, PP3, PP4                                                   | Alport syndrome, autosomal dominant/recessive; Thin basement membrane disease                            | 203780      |
| CKD2_1054 | Low risk       | PKD1    | 16-2142079-TC-T       | c.11379delG        | p.Thr3794fs        | het      | LP                               | PVS1, PPS4_mod, PM2_sup, PP1_strong                                           | Polycystic kidney disease 1                                                                              | 601313      |
| CKD2_1205 | Low risk       | PAX2    | 10-102509550-CG-C     | c.930delG          | p.Leu33fs          | het      | LP                               | PVS1, PM2_sup                                                                 | Glomerulosclerosis, focal segmental, 7                                                                   | 616002      |
| CKD2_1240 | Low risk       | COL4A3  | 2-228124575-G-A       | c.1096G>A          | p.Gly366Arg        | het      | LP                               | PS4_mod, PM1, PM2_sup, PP2, PP3                                               | Alport syndrome, autosomal dominant/recessive; Thin basement membrane disease                            | 104200      |
| CKD2_1311 | Low risk       | KLHL3   | 5-137045450-G-T       | c.230C>A           | p.Ala777Glu        | het      | LP                               | PS3_mod, PS4, PM2_sup, PM3_strong                                             | Pseudohypaldosteronism, type IID                                                                         | 614495      |
| CKD2_1061 | Low risk       | NF1     | 17-29663492-G-A       | c.6147+1G>A        | het                | P        | PVS1_strong, PS4, PM2_sup        | Neurofibromatosis type 1                                                      | 182200                                                                                                   |             |
| CKD2_0122 | Low risk       | ACTG2   | 2-74141962-C-T        | c.769C>T           | p.Arg257Cys        | het      | P                                | PS2_VeryStrong, PS3_sup, PS4, PM2                                             | Visceral myopathy 1                                                                                      | 155310      |
| CKD2_1098 | Low risk       | WT1     | 11-32413566-G-A       | c.1399C>T          | p.Arg467Trp        | het      | P                                | PS4, PM1, PM2_sup, PM5                                                        | Denys-Drash syndrome                                                                                     | 607102      |
| CKD2_0230 | Low risk       | CUBN    | 10-16970304-T-C       | c.6125-2A>G        | het                | P        | PVS1_strong, PM2_sup, PM3_strong | Imerslund-Grasbeck syndrome 1                                                 | 261100                                                                                                   |             |
| CKD2_1266 | Low risk       | SLC34A3 | 9-140129093-CCT-C     | c.1246_1247delCT   | p.Leu417fs         | comp het | LP                               | PVS1, PM2_sup                                                                 | Hypophosphatemic rickets with hypercalcaemia                                                             | 241530      |
| CKD2_1266 | Low risk       | SLC34A3 | 9-140130625-T-TC      | c.1561dupC         | p.Leu521fs         | comp het | LP                               | PVS1, PM2_sup                                                                 | Hypophosphatemic rickets with hypercalcaemia                                                             | 241530      |
| CKD2_0010 | Low risk       | HNF1A   | 12-12141659-G-T       | c.19C>T            | p.Q7X              | het      | P                                | PVS1, PS3_mod, PM4_sup, PP1_mod                                               | MODY, type IIB                                                                                           | 600496      |
| CKD2_1268 | Low risk       | SLCA11  | 17-42533076-G-A       | c.1768C>T          | p.Arg589Cys        | het      | P                                | PS2, PS3_sup, PS4, PM2_sup, PM5, P                                            | Distal renal tubular acidosis 1                                                                          | 179600      |
| CKD2_0333 | Low risk       | PAX2    | 10-102510459-G-G      | c.220C>T           | p.Glu47*           | het      | LP                               | PVS1, PM2_sup                                                                 | Glomerulosclerosis, focal segmental, 7                                                                   | 616002      |
| CKD2_0632 | Low risk       | COL4A5  | X-107863487-A-G       | c.2510-2A>G        | het                | LP       | PVS1_strong, PM2_sup, PP4        | Alport syndrome 1, X-linked                                                   | 301050                                                                                                   |             |
| CKD2_0155 | Low risk       | COL4A4  | 2-227875122-C-A       | c.4429C>T          | p.Glu1477Ter       | het      | LP                               | PVS1, PM2_sup                                                                 | Alport syndrome, autosomal dominant/recessive; Thin basement membrane disease                            | 203780      |
| CKD2_0033 | Low risk       | COL4A4  | 2-227886857-AG-A      | c.4122delC         | p.C1375Vfs*13      | het      | LP                               | PVS1, PM2_sup                                                                 | Alport syndrome, autosomal dominant/recessive; Thin basement membrane disease                            | 203780      |
| CKD2_0909 | Low risk       | COL4A5  | X-107911629-G-A       | c.3685G>A          | p.Gly1229Ser       | hemi     | P                                | PS4, PM1, PM2_sup, PM5, PP2, PP3,                                             | Alport syndrome 1, X-linked                                                                              | 301050      |
| CKD2_0237 | Low risk       | NPHS2   | 1-179521760-G-A       | c.851C>T           | p.Ala284Val        | comp het | P                                | PS3_mod, PS4, PM2_sup, PM3_VeryStrong                                         | Nephrotic syndrome, type 2                                                                               | 600995      |
| CKD2_0237 | Low risk       | NPHS2   | 1-179526214-C-T       | c.686G>A           | p.Arg229Gln        | comp het | P                                | PS3_mod, PS4, PM2_sup, PM3_VeryStrong                                         | Nephrotic syndrome, type 2                                                                               | 600995      |
| CKD2_1161 | Low risk       | PKD1    | 16-2161054-TGAA-GT    | c.4110_4113delC    | p.Tyr1370fs        | het      | LP                               | PVS1, PM2_sup                                                                 | Polycystic kidney disease 1                                                                              | 601313      |
| CKD2_0009 | Low risk       | COL4A5  | X-107821205-TC-T      | c.635delC          | p.P212Qfs*9        | het      | P                                | PVS1, PS4_mod, PM2_sup                                                        | Alport syndrome 1, X-linked                                                                              | 301050      |
| CKD2_0799 | Low risk       | COL4A3  | 2-228124575-G-A       | c.1096G>A          | p.Gly366Arg        | het      | LP                               | PS4_mod, PM1, PM2_sup, PP2, PP3                                               | Alport syndrome, autosomal dominant/recessive; Thin basement membrane disease                            | 104200      |
| CKD2_1032 | Low risk       | COL4A5  | X-107911629-G-A       | c.3685G>A          | p.Gly1229Ser       | hemi     | LP                               | PS4, PM1, PM2_sup, PM5, PP2, PP3,                                             | Alport syndrome 1, X-linked                                                                              | 301050      |
| CKD2_1178 | Low risk       | NPHS2   | 1-179521760-G-A       | c.851C>T           | p.Ala284Val        | comp het | P                                | PS3_mod, PS4, PM2_sup, PM3_VeryStrong                                         | Nephrotic syndrome, type 2                                                                               | 600995      |
| CKD2_1178 | Low risk       | NPHS2   | 1-179526214-C-T       | c.686G>A           | p.Arg229Gln        | comp het | P                                | PS3_mod, PS4, PM2_sup, PM3_VeryStrong                                         | Nephrotic syndrome, type 2                                                                               | 600995      |
| CKD2_0329 | Low risk       | NPHS2   | 1-179521760-G-A       | c.851C>T           | p.Ala284Val        | homo     | P                                | PS3_mod, PS4, PM2_sup, PM3_VeryStrong                                         | Nephrotic syndrome, type 2                                                                               | 600995      |
| CKD2_1369 | Low risk       | PKD2    | 4-88929395-CG-C       | c.514delG          | p.Asp172fs         | het      | P                                | PVS1, PS4_mod, PM2_sup                                                        | Polycystic kidney disease 1                                                                              | 173910      |
| CKD2_1058 | Low risk       | COL4A5  | X-107834398-G-A       | c.1276G>A          | p.Gly426Arg        | hemi     | P                                | PS3_mod, PS4, PM1, PM2_sup, PP2,                                              | Alport syndrome 1, X-linked                                                                              | 301050      |
| CKD2_0145 | Low risk       | PKD1    | 16-2141909-T-G        | c.11412-2A>C       | het                | LP       | PVS1_strong, PM2_sup, PP1        | Polycystic kidney disease 1                                                   | 601313                                                                                                   |             |
| CKD2_0178 | Low risk       | PKD1    | 16-2141909-T-G        | c.11412-2A>C       | het                | LP       | PVS1_strong, PM2_sup, PP1        | Polycystic kidney disease 1                                                   | 601313                                                                                                   |             |
| CKD2_1002 | Low risk       | PKD1    | 16-2141909-T-G        | c.11412-2A>C       | het                | LP       | PVS1_strong, PM2_sup, PP1        | Polycystic kidney disease 1                                                   | 601313                                                                                                   |             |
| CKD2_0870 | Low risk       | PAX2    | 10-102509528-C-GG     | c.76dupG           | p.Val26fs          | het      | LP                               | PVS1, PM2_sup                                                                 | Glomerulosclerosis, focal segmental, 7                                                                   | 616002      |
| CKD2_1007 | Low risk       | PKHD1   | 6-51824680-G-T        | c.5895dupA         | p.Leu1966fs        | comp het | P                                | PVS1, PS4, PM2_supporting                                                     | Polycystic kidney disease 4, with or without hepatic disease                                             | 263200      |
| CKD2_1007 | Low risk       | PKHD1   | 6-51935807-C-T        | c.664A>G           | p.Ile222Val        | comp het | P                                |                                                                               |                                                                                                          |             |

Supplementary Table 6: Top 15 ranked genes across the rare-variant collapsing analysis. Clinical group shows the specific phenotype in which the signal was seen, with the inheritance model showing the specific parameters of included qualifying variants for the signal. For cells with 0 counts, these were replaced with a 1 to calculate a minimum OR, signified by a > sign.

| Gene Name      | Phenotype           | Inheritance Model/ Collapsing Model                           | Best Model           |                       |         |
|----------------|---------------------|---------------------------------------------------------------|----------------------|-----------------------|---------|
|                |                     |                                                               | OR (95% CI)          | P value (X2 test)     | Q value |
| <i>DHDH</i>    | FSGS                | Dominant/Rare PTV                                             | 38.75 (7.42 – 187)   | $2.33 \times 10^{-5}$ | 1.00    |
| <i>NLRP1</i>   | FSGS                | Dominant/Rare Missense MTR50                                  | 13 (4.20 – 34.19)    | $2.33 \times 10^{-5}$ | 1.00    |
| <i>LCTL</i>    | Kidney Failure      | Dominant/Rare Missense                                        | 9.86 (3.42 – 24.98)  | $3.47 \times 10^{-5}$ | 1.00    |
| <i>DNAJC13</i> | FSGS                | Dominant/Rare Not Benign MTR50                                | 16.29 (4.59 – 47.32) | $4.18 \times 10^{-5}$ | 1.00    |
| <i>RPL5</i>    | FSGS                | Dominant/Rare Missense MTR50                                  | 68.6 (9.59 – 427)    | $5.06 \times 10^{-5}$ | 1.00    |
| <i>TIMM8B</i>  | All, Kidney Failure | Dominant/Rare Missense MTR50                                  | 137 (10.03 – 7176)   | $5.63 \times 10^{-5}$ | 1.00    |
| <i>ARMC8</i>   | All                 | Dominant/Rare Missense, Missense MTR50                        | 12.24 (3.36 – 41.93) | $9.91 \times 10^{-5}$ | 1.00    |
| <i>DMC1</i>    | Kidney Failure      | Dominant/Rare Missense LIMBR, Missense MTR50                  | 30.51 (5.16 – 180)   | $1.00 \times 10^{-4}$ | 1.00    |
| <i>DTNB</i>    | FSGS                | Dominant/ Rare Not Benign MTR50                               | 22.55 (4.90 – 84.41) | $1.03 \times 10^{-4}$ | 1.00    |
| <i>CALCR</i>   | All                 | Dominant/Rare Not Benign                                      | 11.32 (3.25 – 35.63) | $1.13 \times 10^{-4}$ | 1.00    |
| <i>TP53RK</i>  | FSGS                | Dominant/Rare PTV                                             | >114 (16.00 – >1270) | $1.35 \times 10^{-4}$ | 1.00    |
| <i>XRCC5</i>   | All                 | Dominant/Rare Missense MTR50                                  | 7.75 (2.65 – 20.15)  | $1.67 \times 10^{-4}$ | 1.00    |
| <i>CDK15</i>   | All                 | Dominant/Ultra Rare Not Benign LIMBR                          | 137 (6.87 – 9743)    | $1.88 \times 10^{-4}$ | 1.00    |
| <i>IMMT</i>    | All                 | Dominant/Ultra Rare Not Benign, Not Benign MTR50, Deleterious | 137 (6.87 – 9743)    | $1.88 \times 10^{-4}$ | 1.00    |
| <i>SUCO</i>    | Kidney Failure      | Dominant/Rare Missense MTR50                                  | 9.27 (2.87 – 25.93)  | $1.91 \times 10^{-4}$ | 1.00    |



Supplementary Table 7: Top results of the common and rare variant secondary gene-based burden analysis. Gene, functional effect, and maximum minor allele frequency (AF) cut-off compose a single mask, used for calculation of enrichment and P-value using fast Firth approximation.

| Gene    | Clinical Group      | Functional Effect | AF Cutoff | Cases   |         |         | Controls |         |         | Effect (95% CI)     | P value  | Q value |
|---------|---------------------|-------------------|-----------|---------|---------|---------|----------|---------|---------|---------------------|----------|---------|
|         |                     |                   |           | Ref/Ref | Ref/Alt | Alt/Alt | Ref/Ref  | Ref/Alt | Alt/Alt |                     |          |         |
| GRAP2   | All                 | Missense          | 0.05      | 183     | 48      | 1       | 5133     | 345     | 4       | 2.4 (1.7 - 3.3)     | 1.82E-06 | 1.00    |
| PPAT    | FSGS                | Missense          | Singleton | 79      | 3       | 0       | 5478     | 4       | 0       | 78.9 (15.7 - 397.3) | 5.75E-06 | 1.00    |
| ESCO2   | FSGS                | Missense          | 0.05      | 67      | 15      | 0       | 5188     | 291     | 3       | 4.2 (2.4 - 7.4)     | 2.07E-05 | 1.00    |
| INPP5J  | Kidney Failure      | Missense          | 0.05      | 113     | 49      | 6       | 4669     | 798     | 15      | 2.0 (1.5 - 2.7)     | 3.87E-05 | 1.00    |
| SLCO1A2 | FSGS                | LOF + Missense    | Singleton | 78      | 4       | 0       | 5465     | 17      | 0       | 23.3 (6.8 - 79.3)   | 4.26E-05 | 1.00    |
| SYNRG   | FSGS                | Missense          | Singleton | 78      | 4       | 0       | 5446     | 36      | 0       | 18.6 (6.4 - 54.3)   | 4.55E-05 | 1.00    |
| KCNIP2  | FSGS                | Missense          | Singleton | 79      | 3       | 0       | 5480     | 2       | 0       | 71.4 (9.2 - 552.2)  | 4.91E-05 | 1.00    |
| FAM96A  | All, Kidney Failure | Missense          | 0.05      | 227     | 5       | 0       | 5474     | 8       | 0       | 24.4 (6.0 - 98.8)   | 6.93E-05 | 1.00    |
| PRDM16  | Kidney Failure      | Missense          | 0.05      | 138     | 30      | 0       | 5108     | 374     | 0       | 2.6 (1.7 - 4.1)     | 7.04E-05 | 1.00    |
| PRR14L  | All                 | Missense          | 0.1       | 67      | 153     | 12      | 2848     | 2520    | 114     | 1.7 (1.3 - 2.2)     | 7.36E-05 | 1.00    |

Supplementary Table 8: Results from the gene-set based rare-variant collapsing analysis.

| Gene Set     | Phenotype    | Model                  | P value | Q value | estimate | conf.low | conf.high | Qualified Case | Unqualified Case | Qualified Ctrl | Unqualified Ctrl | %QV+ Case | %QV+ Ctrl |     |
|--------------|--------------|------------------------|---------|---------|----------|----------|-----------|----------------|------------------|----------------|------------------|-----------|-----------|-----|
| Inflammation | All          | domRareMissense        | 0.0005  | 0.038   | 1.9      | 1.31     | 2.69      | 45             | 187              | 585            | 4897             | 19.4      | 10.7      |     |
| Inflammation | HRO          | domRareMissense        | 0.0005  | 0.038   | 1.9      | 1.31     | 2.69      | 45             | 187              | 585            | 4897             | 19.4      | 10.7      |     |
| Inflammation | ESKD         | domRareMissense        | 0.0008  | 0.041   | 2.03     | 1.33     | 3.03      | 34             | 134              | 453            | 3960             | 20.2      | 10.3      |     |
| Inflammation | All          | domRareMissenseLIMBR   | 0.0015  | 0.057   | 1.92     | 1.27     | 2.85      | 34             | 198              | 421            | 5061             | 14.7      | 7.7       |     |
| Inflammation | FSGS         | domRareMissense        | 0.0029  | 0.079   | 2.43     | 1.34     | 4.22      | 18             | 61               | 451            | 3938             | 22.8      | 10.3      |     |
| Inflammation | HRO          | domRareMissenseLIMBR   | 0.0031  | 0.091   | 3.21     | 1.29     | 6.36      | 30             | 129              | 168            | 219              | 12.9      | 4.5       |     |
| Inflammation | ESKD         | domRareMissenseLIMBR   | 0.0042  | 0.091   | 1.97     | 1.21     | 3.1       | 25             | 143              | 338            | 4075             | 14.9      | 7.7       |     |
| Inflammation | FSGS         | domRareMissenseLIMBR   | 0.0118  | 0.224   | 2.27     | 1.13     | 4.21      | 13             | 66               | 337            | 4052             | 16.5      | 7.7       |     |
| Inflammation | All          | domRareMissenseMTR     | 0.0221  | 0.277   | 1.76     | 1.07     | 2.8       | 23             | 209              | 301            | 5181             | 9.9       | 5.5       |     |
| Inflammation | APOLL Het    | domRareMissenseMTR     | 0.0166  | 0.277   | 0.46     | 0.2      | 0.9       | 9              | 330              | 255            | 4308             | 2.7       | 5.6       |     |
| Pyroptosis   | ESKD         | domRareMissense        | 0.0269  | 0.277   | 1.6      | 1.05     | 2.4       | 33             | 135              | 535            | 3878             | 19.6      | 12.1      |     |
| Pyroptosis   | FSGS         | cmphetHR               | 0.0194  | 0.277   | 11.43    | 1.15     | 59.41     | 2              | 77               | 8              | 4381             | 2.5       | 0.2       |     |
| Pyroptosis   | FSGS         | domRareMissenseLIMBR   | 0.0208  | 0.277   | 2.2      | 1.1      | 4.09      | 13             | 66               | 342            | 4047             | 16.5      | 7.8       |     |
| Pyroptosis   | FSGS         | domURareNotBenign      | 0.0273  | 0.277   | 3.19     | 0.88     | 8.12      | 5              | 74               | 83             | 4306             | 6.3       | 1.9       |     |
| Inflammation | HRO          | domRareMissenseMTR     | 0.0266  | 0.288   | 1.09     | 0.93     | 1.93      | 21             | 212              | 9              | 170              | 9         | 3.4       |     |
| Inflammation | ESKD         | domRareMissenseMTR     | 0.0302  | 0.287   | 1.82     | 1.01     | 3.09      | 17             | 151              | 236            | 4177             | 10.1      | 5.3       |     |
| Pyroptosis   | HRO          | domRareMissense        | 0.0367  | 0.328   | 1.97     | 1.02     | 3.95      | 37             | 196              | 16             | 160              | 15.9      | 9.1       |     |
| Pyroptosis   | All          | domRareMissense        | 0.0474  | 0.385   | 1.43     | 0.99     | 2.05      | 42             | 190              | 674            | 4808             | 18.1      | 12.3      |     |
| Pyroptosis   | FSGS         | domRareMissenseMTR     | 0.0565  | 0.427   | 2.88     | 1.09     | 6.36      | 24             | 204              | 432            | 4219             | 17.4      | 11.1      |     |
| Inflammation | HRO          | domRareNotBenignLIMBR  | 0.0567  | 0.431   | 2.99     | 0.93     | 12.62     | 15             | 218              | 4              | 172              | 6.4       | 2.3       |     |
| Pyroptosis   | FSGS         | domRareMissense        | 0.061   | 0.442   | 1.73     | 0.92     | 3.07      | 16             | 63               | 529            | 3880             | 20.3      | 12.1      |     |
| Pyroptosis   | HRO          | domRareMissenseLIMBR   | 0.0649  | 0.448   | 2.21     | 0.96     | 5.58      | 24             | 209              | 9              | 167              | 10.3      | 5.1       |     |
| Inflammation | All          | domRareMissenseLIMBR   | 0.0739  | 0.484   | 1.98     | 0.93     | 4.66      | 28             | 249              | 436            | 4547             | 2.4       | 4.5       |     |
| Pyroptosis   | ESKD         | cmphetHR               | 0.071   | 0.458   | 5.6      | 0.55     | 30.95     | 2              | 166              | 7              | 4406             | 1.2       | 0.2       |     |
| Inflammation | APOLL Het    | domRareNotBenignMTR    | 0.0784  | 0.477   | 0.54     | 0.24     | 1.07      | 9              | 330              | 218            | 4345             | 2.7       | 4.8       |     |
| Inflammation | FSGS         | domRareMissenseMTR     | 0.0881  | 0.486   | 1.9      | 0.78     | 4.01      | 8              | 71               | 233            | 4156             | 10.1      | 5.3       |     |
| Pyroptosis   | ESKD         | domRareMissenseLIMBR   | 0.0915  | 0.494   | 1.54     | 0.91     | 2.49      | 14             | 219              | 349            | 4067             | 12.5      | 6.8       |     |
| Pyroptosis   | HRO          | domRareNotBenignLIMBR  | 0.0863  | 0.486   | 2.81     | 0.86     | 11.99     | 14             | 219              | 4              | 172              | 6.4       | 2.3       |     |
| Pyroptosis   | FSGS         | domRareMissenseMTR     | 0.0951  | 0.498   | 2.03     | 0.78     | 4.51      | 7              | 72               | 186            | 4203             | 8.9       | 4.2       |     |
| Pyroptosis   | ESKD         | domRareMissenseMTR     | 0.104   | 0.527   | 1.62     | 0.83     | 2.95      | 13             | 155              | 194            | 4129             | 7.7       | 4.4       |     |
| Auto Rec     | No Mendelian | domRareNotBenignLIMBR  | 0.1092  | 0.535   | 1.28     | 0.94     | 1.75      | 159            | 65               | 3530           | 1962             | 71        | 64.4      |     |
| Pyroptosis   | All          | cmphetHR               | 0.1181  | 0.537   | 4.05     | 0        | 21.5      | 2              | 230              | 9              | 5473             | 0.9       | 1.7       |     |
| Pyroptosis   | All          | domRareMissenseMTR     | 0.1209  | 0.557   | 1.52     | 0.85     | 2.57      | 17             | 215              | 243            | 5239             | 7.3       | 4.4       |     |
| Pyroptosis   | FSGS         | domRareNotBenign       | 0.1465  | 0.571   | 1.64     | 0.74     | 3.24      | 10             | 69               | 343            | 4046             | 12.7      | 7.8       |     |
| Pyroptosis   | FSGS         | domRareNotBenignMTR    | 0.1386  | 0.571   | 1.89     | 0.77     | 3.99      | 8              | 71               | 243            | 4146             | 10.1      | 5.5       |     |
| Pyroptosis   | APOLL Het    | domRareNotBenignMTR    | 0.1433  | 0.571   | 0.57     | 0.17     | 1.17      | 331            | 8                | 218            | 24               | 4371      | 4.4       | 4.9 |
| Inflammation | HRO          | domRareNotBenign       | 0.1437  | 0.571   | 2.05     | 0.79     | 5.95      | 18             | 215              | 7              | 169              | 7.7       | 4.1       |     |
| Pyroptosis   | HRO          | cmphetSynHR            | 0.1409  | 0.571   | 0        | 0        | 3.21      | 0              | 233              | 2              | 174              | 0         | 1.1       |     |
| Auto Rec     | No Mendelian | domRareNotBenign       | 0.1315  | 0.571   | 1.28     | 0.92     | 1.76      | 58             | 166              | 1163           | 4319             | 25.9      | 21.2      |     |
| Inflammation | FSGS         | domURareDel            | 0.1616  | 0.634   | 1.98     | 0.79     | 5.31      | 4              | 64               | 24             | 168              | 2.5       | 1.5       |     |
| Inflammation | FSGS         | cmphetHR               | 0.1674  | 0.621   | 2.88     | 0.33     | 11.71     | 2              | 77               | 33             | 4356             | 2.5       | 0.8       |     |
| Inflammation | APOLL Het    | domRareNotBenign       | 0.179   | 0.633   | 0.69     | 0.39     | 1.15      | 17             | 322              | 319            | 4244             | 5         | 7         |     |
| Pyroptosis   | HRO          | domRareMissenseMTR     | 0.1767  | 0.633   | 2.03     | 0.72     | 6.56      | 15             | 218              | 6              | 170              | 6.4       | 3.4       |     |
| Pyroptosis   | All          | domRareSyn             | 0.1855  | 0.641   | 0.63     | 0.11     | 1.17      | 11             | 231              | 109            | 5109             | 4.7       | 6.8       |     |
| Inflammation | APOLL Het    | domRareMissense        | 0.1997  | 0.661   | 0.76     | 0.49     | 1.13      | 29             | 310              | 498            | 4065             | 8.6       | 10.9      |     |
| Auto Rec     | No Mendelian | domRareNotBenignMTR    | 0.1999  | 0.661   | 1.21     | 0.9      | 1.64      | 149            | 75               | 3333           | 2149             | 66.5      | 60.8      |     |
| Auto Rec     | No Mendelian | domRareNotBenign       | 0.2338  | 0.756   | 0.79     | 0.53     | 1.21      | 193            | 31               | 4818           | 664              | 86.2      | 87.9      |     |
| Inflammation | ESKD         | domRareNotBenignMTR    | 0.2319  | 0.804   | 1.06     | 0.29     | 4.66      | 4              | 64               | 24             | 168              | 2.5       | 1.5       |     |
| Inflammation | APOLL Het    | cmphetSynHR            | 0.2896  | 0.804   | 1.83     | 0.45     | 5.45      | 4              | 335              | 23             | 4540             | 1.2       | 0.5       |     |
| Pyroptosis   | ESKD         | domRareSyn             | 0.2809  | 0.804   | 0.63     | 0.27     | 1.3       | 8              | 160              | 296            | 4117             | 4.8       | 6.7       |     |
| Pyroptosis   | FSGS         | domURareNotBenignMTR   | 0.2946  | 0.804   | 1.91     | 0.22     | 7.58      | 2              | 77               | 50             | 4339             | 2.5       | 1.1       |     |
| Pyroptosis   | APOLL Het    | cmphetSynHR            | 0.3055  | 0.804   | 1.96     | 0.21     | 9.4       | 2              | 117              | 337            | 411              | 4652      | 0.6       | 0.2 |
| Pyroptosis   | APOLL Het    | domRareMissense        | 0.2658  | 0.804   | 1.2      | 0.85     | 1.85      | 49             | 290              | 559            | 4007             | 14.5      | 12.2      |     |
| Pyroptosis   | APOLL Het    | domRareMissenseMTR     | 0.2618  | 0.804   | 0.65     | 0.3      | 1.25      | 10             | 329              | 198            | 4365             | 2.9       | 4.3       |     |
| Pyroptosis   | APOLL Het    | domRareSyn             | 0.2664  | 0.804   | 1.26     | 0.81     | 1.89      | 29             | 310              | 311            | 4252             | 8.6       | 6.8       |     |
| Pyroptosis   | APOLL Het    | domURareNotBenign      | 0.3118  | 0.804   | 1.39     | 0.61     | 2.83      | 9              | 330              | 87             | 4476             | 2.7       | 1.9       |     |
| Inflammation | HRO          | domRareNotBenignMTR    | 0.3036  | 0.804   | 0.22     | 0.02     | 0.25      | 1              | 233              | 9              | 173              | 0         | 1.1       |     |
| Inflammation | HRO          | domRareNotBenignMTR    | 0.2876  | 0.804   | 2.07     | 0.6      | 9.11      | 11             | 222              | 4              | 172              | 4.7       | 2.3       |     |
| Auto Rec     | No Mendelian | domRareMissenseMTR     | 0.3077  | 0.804   | 1.2      | 0.86     | 1.68      | 172            | 52               | 3926           | 1556             | 76.8      | 71.6      |     |
| Pyroptosis   | APOLL Het    | domRareNotBenignLIMBR  | 0.3175  | 0.804   | 0.74     | 0.39     | 1.28      | 14             | 325              | 260            | 4303             | 4.1       | 5.7       |     |
| Inflammation | APOLL Het    | domRareNotBenignLIMBR  | 0.3203  | 0.804   | 0.74     | 0.39     | 1.28      | 15             | 269              | 314            | 5294             | 6.4       | 6.9       |     |
| Inflammation | ESKD         | domRareNotBenign       | 0.3595  | 0.881   | 1.28     | 0.68     | 2.22      | 15             | 153              | 300            | 4113             | 8.9       | 6.8       |     |
| Pyroptosis   | FSGS         | domRareSyn             | 0.3708  | 0.881   | 0.52     | 0.1      | 1.58      | 3              | 76               | 297            | 4092             | 3.8       | 6.8       |     |
| Pyroptosis   | FSGS         | domURareNotBenignLIMBR | 0.3705  | 0.881   | 1.59     | 0.18     | 6.22      | 2              | 77               | 63             | 4326             | 2.5       | 1.4       |     |
| Pyroptosis   | FSGS         | domURareNotBenign      | 0.3739  | 0.886   | 1.56     | 0.19     | 6.09      | 2              | 77               | 63             | 4326             | 2.5       | 1.4       |     |
| Inflammation | APOLL Het    | domRareMissense        | 0.4064  | 0.915   | 0.81     | 0.5      | 1.26      | 23             | 316              | 376            | 4187             | 6.8       | 8.2       |     |
| Pyroptosis   | HRO          | domRareNotBenignMTR    | 0.4095  | 0.915   | 1.9      | 0.54     | 8.48      | 10             | 223              | 4              | 172              | 4.3       | 2.3       |     |
| Auto Rec     | No Mendelian | domURareDel            | 0.4094  | 0.915   | 0.87     | 0.63     | 1.19      | 62             | 162              | 1711           | 3771             | 27.7      | 31.2      |     |
| Inflammation | FSGS         | domRareNotBenignMTR    | 0.4248  | 0.936   | 1.36     | 0.42     | 3.39      | 5              | 74               | 203            | 4186             | 6.3       | 4.6       |     |
| Inflammation | All          | cmphetHR               | 0.4794  | 0.944   | 1.41     | 0.27     | 4.63      | 3              | 290              | 559            | 4007             | 14.5      | 12.2      |     |
| Inflammation | ESKD         | domRareNotBenignLIMBR  | 0.498   | 0.946   | 1.25     | 0.62     | 2.3       | 12             | 156              | 249            | 4164             | 7.1       | 5.6       |     |
| Inflammation | FSGS         | cmphetSynHR            | 0.4444  | 0.946   | 1.77     | 0.04     | 11.17     | 1              | 78               | 26             | 4363             | 1.3       | 0.6       |     |
| Inflammation | FSGS         | domRareNotBenign       | 0.5033  | 0.946   | 1.28     | 0.49     | 2.82      | 7              | 72               | 300            | 4089             | 8.9       | 6.8       |     |
| Inflammation | FSGS         | domRareNotBenignLIMBR  | 0.4609  | 0.946   | 1.35     | 0.47     | 3.12      | 6              | 243              | 141            | 4147             | 7.6       | 6.7       |     |
| Inflammation | FSGS         | domRareSyn             | 0.4852  | 0.946   | 0.57     | 0.11     | 1.74      | 3              | 76               | 270            | 4119             | 3.8       | 6.2       |     |
| Pyroptosis   | ESKD         | domURareDel            | 0.5264  | 0.946   | 0.34     | 0.01     | 2.01      | 1              | 167              | 63             | 4350             | 0.6       | 1.4       |     |
| Pyroptosis   | ESKD         | domURareNotBenignLIMBR | 0.5253  | 0.946   | 0.34     | 0.01     | 2.02      | 1              | 167              | 62             | 4351             | 0.6       | 1.4       |     |
| Pyroptosis   | ESKD         | domURareNotBenignMTR   | 0.5139  | 0.946   | 0.4      | 0.04     | 2.39      | 1              | 167              | 62             | 4351             | 0.6       | 1.4       |     |
| Pyroptosis   | APOLL Het    | domRareMissense        | 0.5292  | 0.946   | 1.14     | 0.74     | 1.69      | 30             | 309              | 358            | 4205             | 8.8       | 7.8       |     |
| Pyroptosis   | APOLL Het    | domRareNotBenign       | 0.5265  | 0.946   | 0.85     | 0.52     | 1.33      | 23             | 316              | 359            | 4204             | 6.8       | 7.9       |     |
| Inflammation | HRO          | domRareNotBenign       | 0.4629  | 0.946   | 2.09     | 0.34     | 22.3      | 5              | 228              | 2              | 174              | 2.1       | 1.1       |     |
| Pyroptosis   | HRO          | cmphetHR               | 0.5271  | 0.946   | 11.4     | 0.05     | inf       | 1              | 221              | 0              | 176              | 0         | 1.1       |     |
| Pyroptosis   | HRO          | domRareSyn             | 0.4971  | 0.946   | 0.67     | 0.25     | 1.8       | 10             | 223              | 11             | 165              | 4.3       | 6.2       |     |
| Auto Rec     | No Mendelian | domRareMissense        | 0.4948  | 0.946   | 0.75     | 0.34     | 1.94      | 217            | 7                | 5324           | 158              | 96.9      | 97.1      |     |
| Auto Rec     | No Mendelian | domURareNotBenign      | 0.4846  | 0.946   | 0.9      | 0.67     | 1.2       | 89             | 135              | 2314           | 3168             | 39.7      | 42.2      |     |
| Inflammation | All          | cmphetSynHR            | 0.5229  | 1.001   | 0.53     | 0.29     | 1.28      | 231            | 1                | 231            | 0.4              | 54.54     | 0.5       |     |
| Inflammation | All          | domRareNotBenign       | 0.6937  | 1.000   | 1.09     | 0.62     | 1.81      | 18             | 214              | 374            | 5108             | 7.8       | 6.8       |     |
| Inflammation | All          | domRareNotBenignLIMBR  | 0.6626  | 1.000   | 1.13     | 0.61     | 1.95      | 15             | 217              | 303            | 5179             | 6.5       | 5.5       |     |
| Inflammation | All          | domRareNotBenignMTR    | 1       | 1.000   | 0.99     | 0.48     | 1.85      | 11             | 221              | 253            | 5229             | 4.7       | 4.6       |     |
| Inflammation | All          | domRareNotBenignMTR    | 0.5793  | 1.000   | 1.2      | 0.62     | 3.3       | 4              | 84               | 284            | 5398             | 17.1      | 1.5       |     |
| Inflammation | All          | domRareSyn             | 0.5865  | 1.000   | 0.82     | 0.42     | 1.47      | 13             | 218              | 331            | 4151             | 6.6       | 6         |     |
| Inflammation | All          | domURareDel            | 0.7794  | 1.000   | 1.13     | 0.29     | 3.14      | 4              | 228              | 71             | 5411             | 1.7       | 1.3       |     |
| Inflammation | All          | domURareNotBenign      | 1       | 1.000   | 1.01     | 0.32     | 2.52      | 5              | 227              | 102            | 5380             | 2.2       | 1.9       |     |
| Inflammation | All          | domURareNotBenignLIMBR | 0.7996  | 1.000   | 0.67     | 0.13     | 2.08      | 3              | 229              | 90             | 5382             | 1.3       | 1.6       |     |
| Inflammation | All          | domURareNotBenignMTR   | 1       | 1.000   | 1        | 0        | 0.85      | 228            | 4                | 229            | 90               | 5382      | 1.3       | 1.6 |
| Inflammation | ESKD         | cmphetHR               | 0.6733  | 1.000   | 1.27     | 0.14     | 5.12      | 2              | 166              | 32             | 4381             | 1.2       | 0.7       |     |
| Inflammation | ESKD         | cmphetSynHR            | 0.6334  | 1.000   | 0        | 0        | 3.02      | 0              | 168              | 26             | 4387             | 0         | 0.6       |     |
| Inflammation | ESKD         | domRareNotBenignMTR    | 0.7124  | 1.000   | 1.11     | 0.49</   |           |                |                  |                |                  |           |           |     |

Supplementary Table 9: Qualifying variants identified within the inflammasome gene-set within the dominant rare missense model for the full cohort.

| Case      | Variant          | Gene   | Previous disease association |
|-----------|------------------|--------|------------------------------|
| CKD2_1222 | 1-159036087-T-G  | AIM2   | No                           |
| CKD2_0937 | 1-247587239-A-G  | NLRP3  | No                           |
| CKD2_0561 | 1-247587389-A-G  | NLRP3  | No                           |
| CKD2_1041 | 1-247588420-A-G  | NLRP3  | No                           |
| CKD2_0388 | 1-247593014-T-C  | NLRP3  | No                           |
| CKD2_0482 | 11-104900539-T-A | CASP1  | No                           |
| CKD2_1173 | 11-104900565-G-A | CASP1  | No                           |
| CKD2_0495 | 11-279409-C-T    | NLRP6  | No                           |
| CKD2_1372 | 11-281097-G-A    | NLRP6  | No                           |
| CKD2_0770 | 11-281433-G-T    | NLRP6  | No                           |
| CKD2_1397 | 11-281773-T-C    | NLRP6  | No                           |
| CKD2_0196 | 11-284626-G-A    | NLRP6  | No                           |
| CKD2_0339 | 11-285255-C-T    | NLRP6  | No                           |
| CKD2_0112 | 11-7091547-C-G   | NLRP14 | No                           |
| CKD2_0112 | 11-7981685-G-A   | NLRP10 | No                           |
| CKD2_0339 | 11-7981713-C-G   | NLRP10 | No                           |
| CKD2_0423 | 16-31212939-C-G  | PYCARD | No                           |
| CKD2_0199 | 16-31213774-C-G  | PYCARD | No                           |
| CKD2_0480 | 16-3293244-A-G   | MEFV   | No                           |
| CKD2_0482 | 16-3293302-T-C   | MEFV   | No                           |
| CKD2_1249 | 16-3294028-C-T   | MEFV   | No                           |
| CKD2_1271 | 16-3299732-C-G   | MEFV   | No                           |
| CKD2_0443 | 16-3304293-T-C   | MEFV   | No                           |
| CKD2_0731 | 16-3304653-CT-AC | MEFV   | No                           |
| CKD2_0809 | 16-3304659-C-T   | MEFV   | No                           |
| CKD2_1318 | 17-5347759-C-T   | DHX33  | No                           |
| CKD2_0522 | 17-5357202-G-A   | DHX33  | No                           |
| CKD2_0457 | 17-5365850-C-T   | DHX33  | No                           |
| CKD2_0112 | 17-5418216-C-T   | NLRP1  | No                           |
| CKD2_0618 | 17-5425000-GT-AA | NLRP1  | No                           |
| CKD2_0482 | 17-5437222-C-T   | NLRP1  | No                           |
| CKD2_0678 | 17-5442786-C-T   | NLRP1  | No                           |
| CKD2_0454 | 17-5462016-C-G   | NLRP1  | No                           |
| CKD2_0114 | 17-5462323-C-T   | NLRP1  | No                           |
| CKD2_0692 | 17-5462748-C-A   | NLRP1  | No                           |
| CKD2_0108 | 17-5462937-C-T   | NLRP1  | No                           |
| CKD2_1326 | 17-5487106-C-T   | NLRP1  | No                           |
| CKD2_1238 | 17-5487114-G-A   | NLRP1  | No                           |
| CKD2_0388 | 19-15164764-G-A  | CASP14 | No                           |
| CKD2_1006 | 19-48725055-T-C  | CARD8  | No                           |
| CKD2_1271 | 19-48734052-G-T  | CARD8  | No                           |
| CKD2_0059 | 19-48734061-G-A  | CARD8  | No                           |
| CKD2_0515 | 19-54310857-T-C  | NLRP12 | No                           |
| CKD2_1237 | 19-56235418-C-G  | NLRP9  | No                           |
| CKD2_1352 | 19-56235418-C-G  | NLRP9  | No                           |
| CKD2_0127 | 19-56243626-G-A  | NLRP9  | No                           |
| CKD2_0730 | 19-56243874-A-C  | NLRP9  | No                           |
| CKD2_0577 | 19-56244516-C-T  | NLRP9  | No                           |
| CKD2_0515 | 19-56244672-C-G  | NLRP9  | No                           |
| CKD2_1249 | 19-56297022-G-A  | NLRP11 | No                           |
| CKD2_0770 | 19-56423231-G-A  | NLRP13 | No                           |
| CKD2_0108 | 2-202082453-C-T  | CASP10 | No                           |
| CKD2_0172 | 2-32475771-G-A   | NLRC4  | No                           |
| CKD2_1128 | 2-32475819-G-C   | NLRC4  | No                           |
| CKD2_1249 | 5-70308694-G-T   | NAIP   | No                           |
| CKD2_1343 | 8-144644980-C-G  | GSDMD  | No                           |
| CKD2_0076 | 8-144645013-G-C  | GSDMD  | No                           |

Supplementary Figure 1: Genetic ancestry and clustering using principal components analyses of exome ancestry markers on a UMAP projection. Panel A shows genetic ancestry clusters by predicted ethnicity. Panel B shows the same genetic ancestry clusters by APOL1 risk genotype of included samples and those that were excluded by genetic ancestry-matching. The majority of included samples have a predicted genetic ancestry of African or Hispanic.

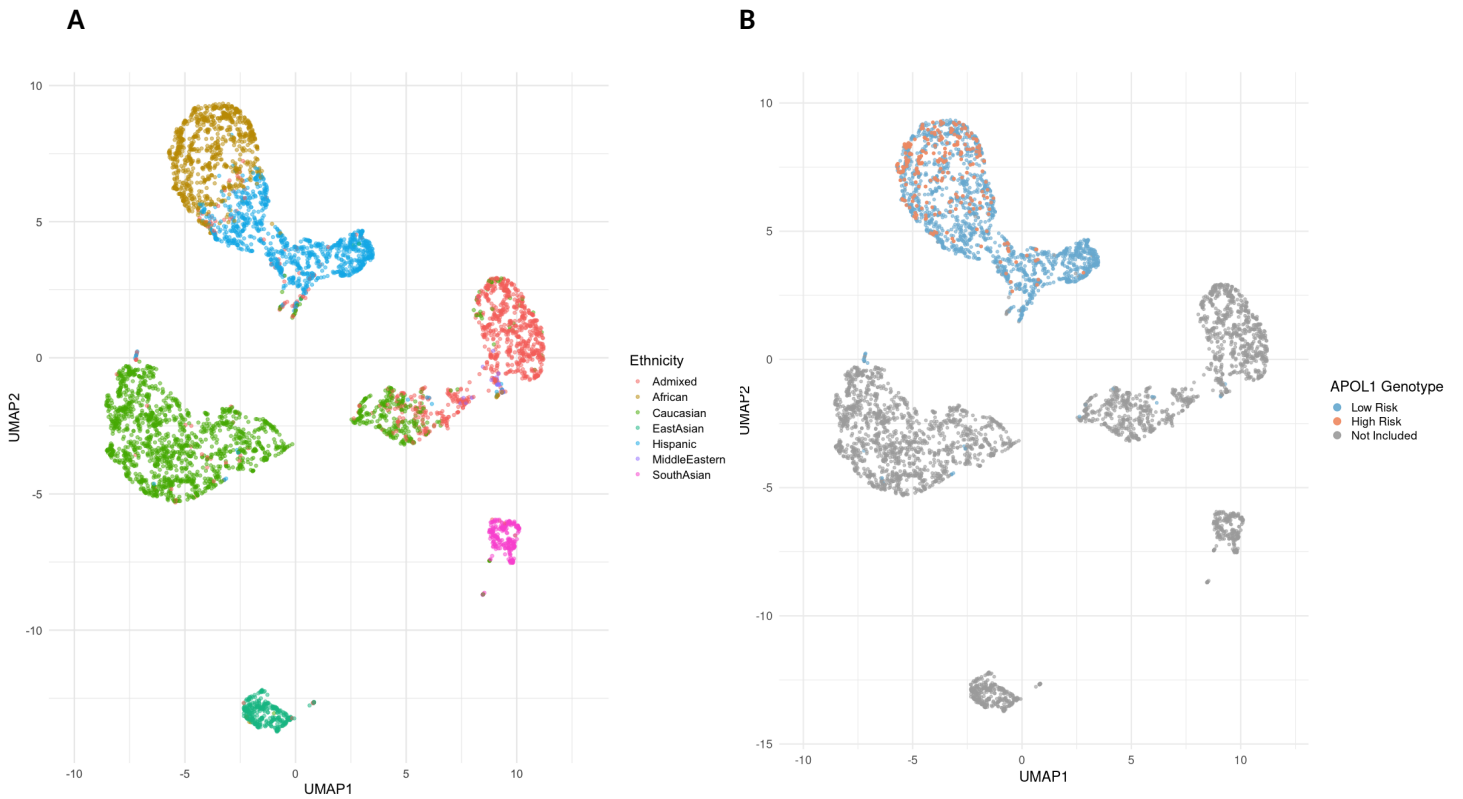

Supplementary Figure 2. Lifetime risk of the development of kidney failure comparing subjects with specific high-risk APOL1 genotypes to low-risk APOL1 genotype. Median time to kidney failure denoted and global Logrank P-value shown.

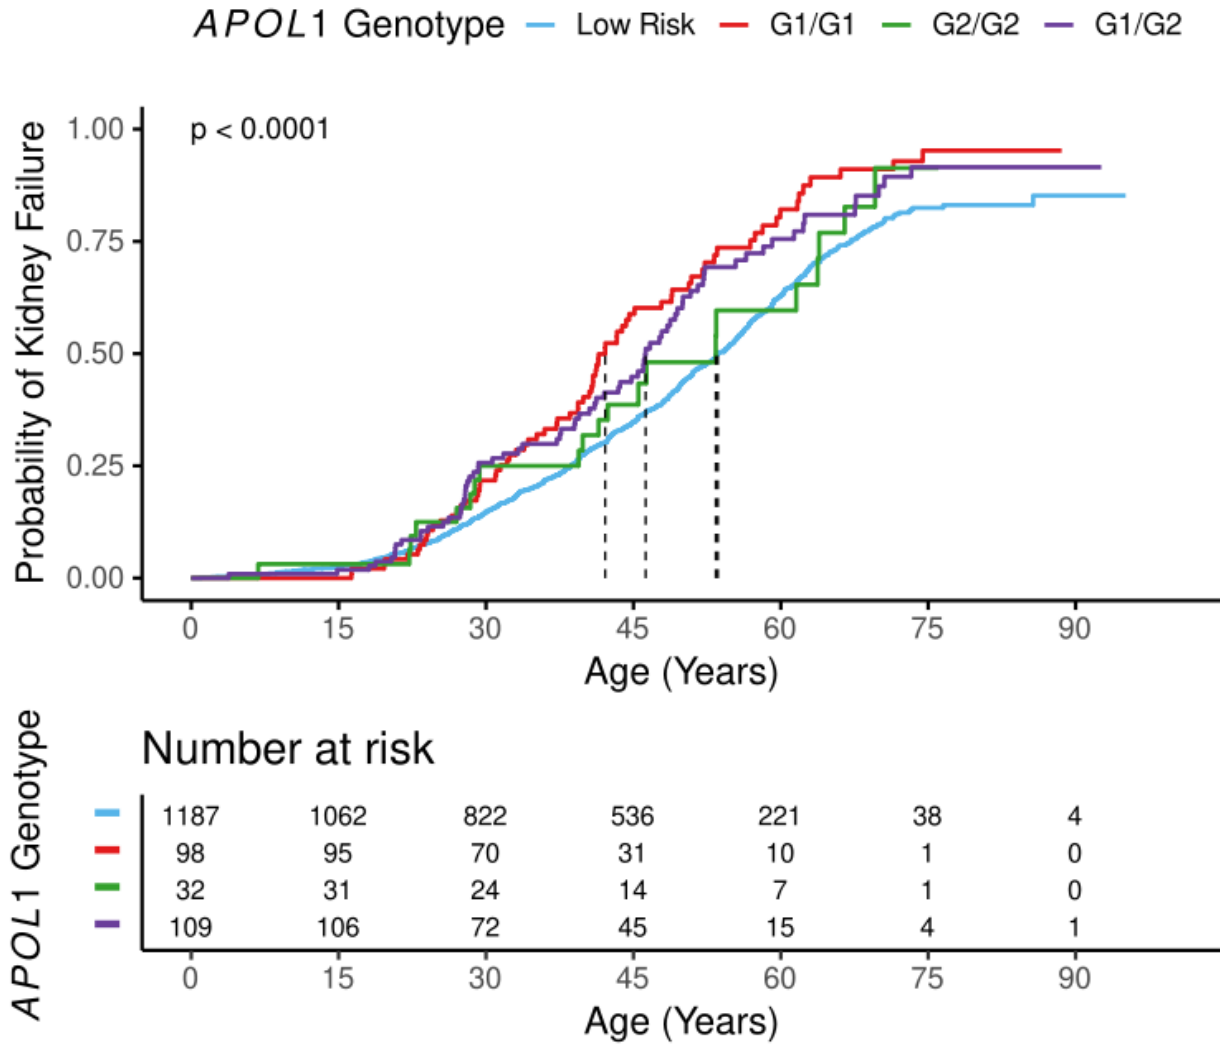

Supplementary Figure 3. eGFR change over time in subjects by specific APOL1 genotype. eGFR decline rate calculated with covariates held at mean values. Adjusted for primary cause of kidney disease, family history of kidney disease, diabetes mellitus, hypertension, genetic ancestry cluster, and initial measured eGFR.

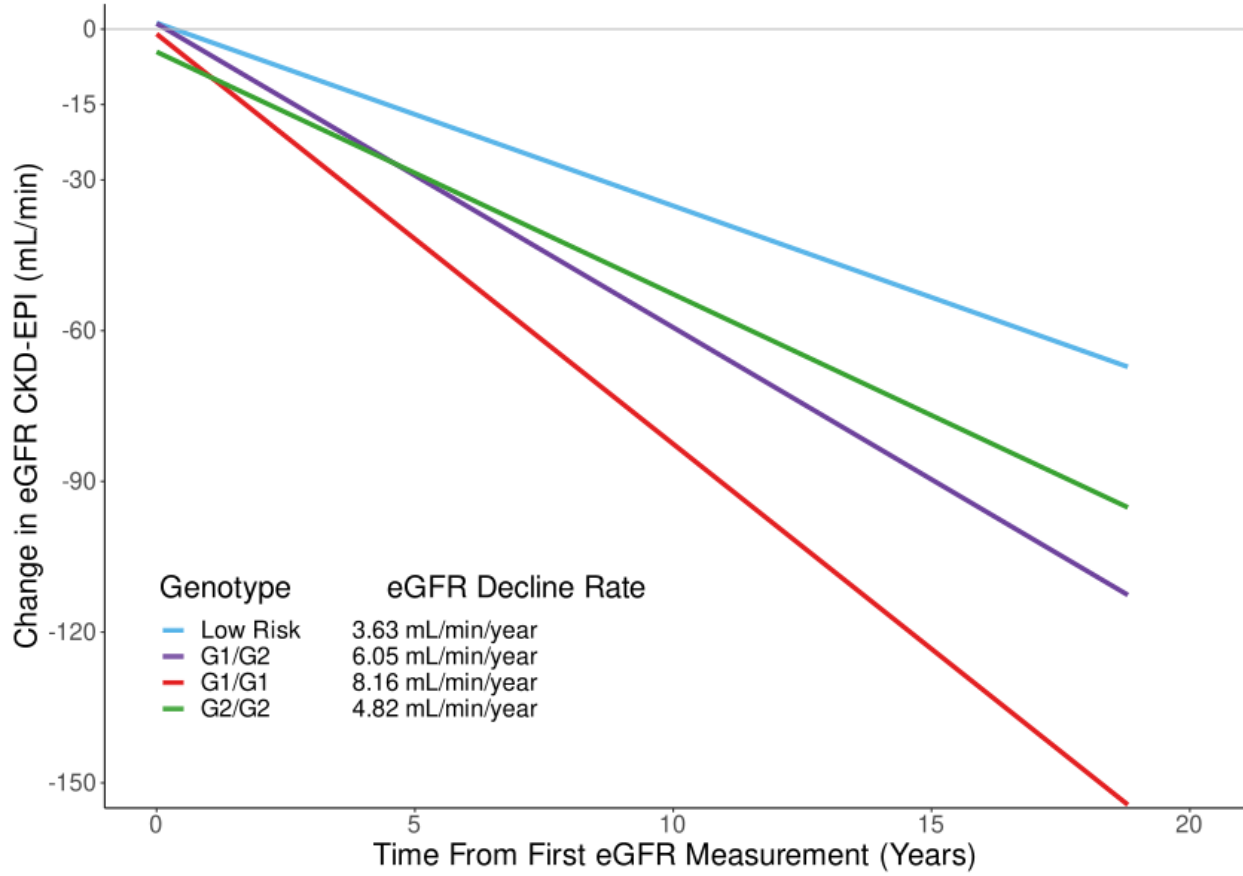

Supplementary Figure 4: Lifetime risk of developing kidney failure for the interaction between APOL1 high-risk genotype and primary cause of kidney disease. Cox proportional hazard models applied to 1426 CKD patients. Analyses included the main effect of APOL1 risk genotype which remained significant in each model. Cox models were adjusted for family history of kidney disease, sex, ZIP code based median income, genetic ancestry cluster, Elixhauser comorbidity score, diabetes mellitus and hypertension.

Abbreviations: C3GN = C3 glomerulopathy, DKD = diabetic kidney disease, FSGS = focal segmental glomerulosclerosis, HTN = hypertension-associated nephropathy, IgAN = IgA nephropathy, MN = membranous nephropathy, SLE = systemic lupus erythematosus, CAKUT = congenital anomalies of the kidney and urinary tract, ADPKD = autosomal dominant polycystic kidney disease.

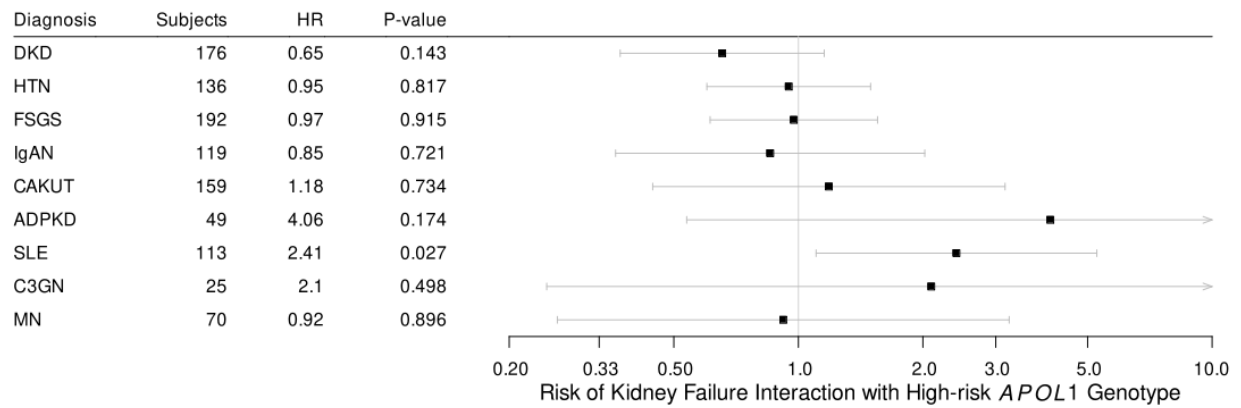

Supplementary Figure 5: eGFR change over time in subjects characterized by number of APOL1 risk alleles. eGFR decline rate calculated with covariates held at mean values. Adjusted for primary cause of kidney disease, family history of kidney disease, diabetes mellitus, hypertension, genetic ancestry cluster, and initial measured eGFR.

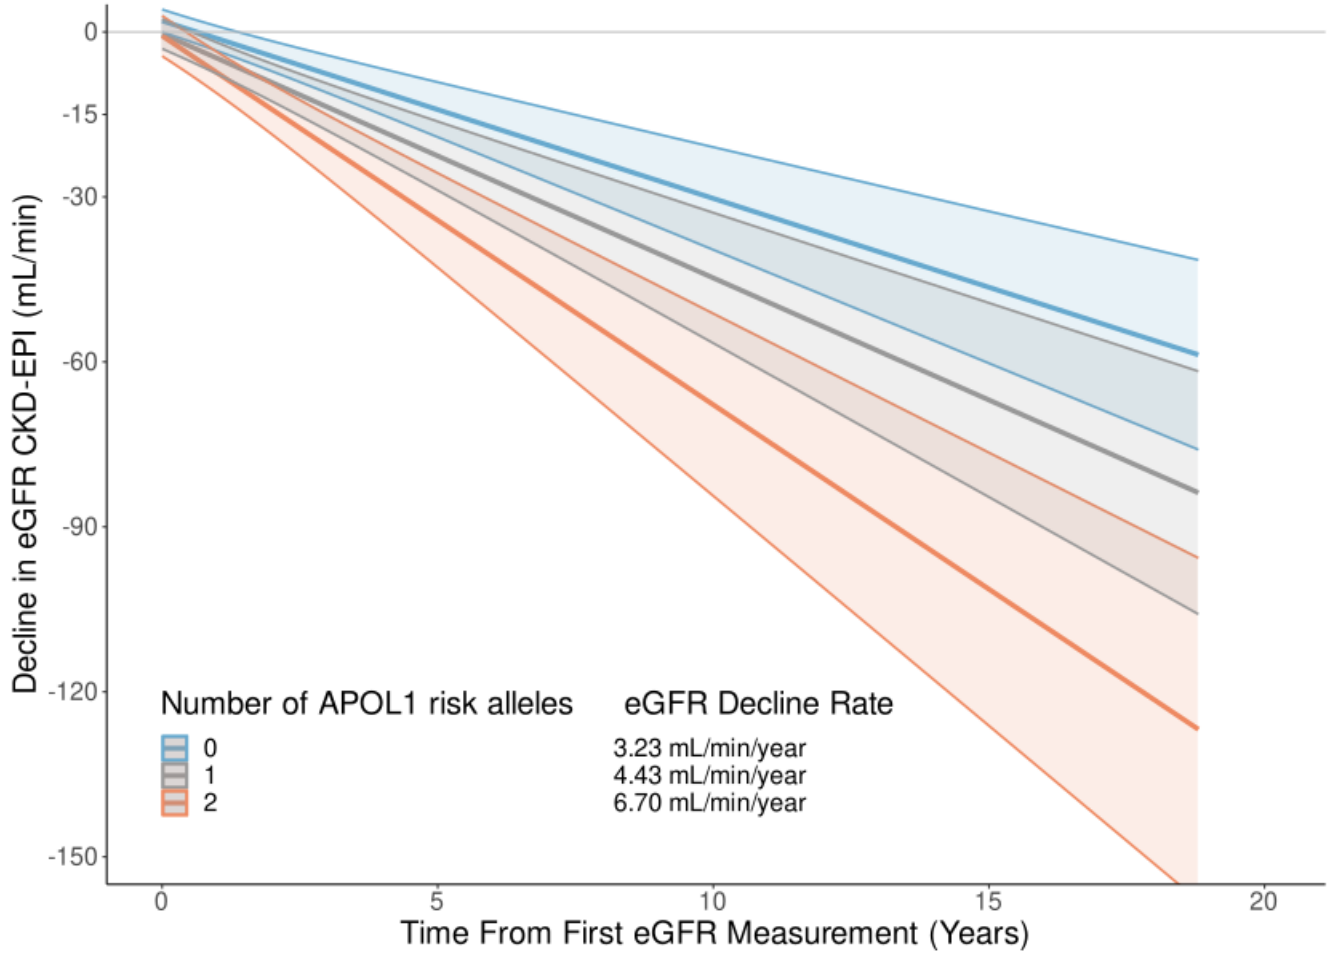



## Supplementary Methods:

Inclusion criteria for CUIMC Genetic Studies of Chronic Kidney Disease biobank (IRB #AAAC7385):

Patients who were seen by the CUIMC Nephrology Division with CKD were eligible for enrolment. CKD was defined by kidney failure defined by the requirement for dialysis or transplantation, Creatinine >1.5 mg/dL in males or >1.3 mg/dL in females with or without proteinuria, and/or the presence of significant proteinuria or hematuria indicative of active glomerular disease.

## Exome Sequencing:

Genomic DNA was isolated following standardized protocols. Most were isolated from peripheral blood samples, but other sources were also accepted. Exome sequences were captured using Roche, Agilent, Integrated DNA Technologies (IDT), or Haloplex kits and sequenced on Illumina platforms. FASTQ data were processed and aligned to hg19/GRCh37 using BWA-MEM, and variants were called using the Genome Analysis Toolkit (GATK) v3.6 best practices. (1,2) Variant annotation was performed using ATAV.(3) Variant level QC included a coverage depth  $\geq 10$ , QD  $\geq 5$ , Qual  $\geq 50$ , MQ  $\geq 40$ , GQ  $\geq 20$ , Fisher's strand bias score (FS)  $\leq 60$  (SNP),  $\leq 200$  (indels), strand odds ratio (SOR)  $\leq 3$  (SNV),  $\leq 10$  (indels), read position rank sum score (RPRS)  $\geq 3$ , mapping quality rank sum score (MQRS)  $\geq -10$ , alternate allele fraction for heterozygous call  $\geq 0.3$ , VQSLOD  $\geq -2.632$  (SNP),  $\geq 1.262$  (indel), random forest true positive probability based on gnomAD  $\geq 0.01$  (SNP),  $\geq 0.02$  (indel) with known sequencing artifacts excluded.(4)

## Clinical Outcomes Genetic Ancestry Matching:

Genetic principle components (PCs) were calculated using flashpca from 12840 ancestry-informative markers. These 10 genetic PCs were used as the input for Louvain clustering to create genetic ancestry clusters. Genetic ancestry clusters with fewer than 5 high risk APOL1 genotype individuals were excluded from the analysis to limit case-control imbalance and bias introduced by genetic ancestry.

## Genetic Analysis Cohort Selection Methods:

Individuals included in the control cohort were selected from the ATAV database at the Institute of Genomic Medicine (IGM) who carried a diagnosis of control or healthy blood relative and includes individuals sequenced for the biobank and other projects at the IGM. Individuals were excluded if <85% of the consensus coding sequence bases were adequately covered and if contamination was >2% per VerifyBamID.(5) KING was used to evaluate relatedness between all individuals and we removed one of each pair that showed relatedness of second degree relatives or closer with the inclusion of cases prioritized to controls.(6) Coverage harmonization was then performed per site using a 7% max coverage difference with a depth  $\geq 10$ . Genetic principle components analysis (PCA) dimensions calculated were again calculated using flashpca from 12840 ancestry-informative markers and the top 10 dimensions were used for Louvain clustering to create genetic ancestry clusters. This dimensionality reduction was checked using uniform manifold approximation and projection (UMAP).(7) Genetic ancestry clusters with fewer than 5 high risk genotype individuals were excluded from the analysis to limit genetic ancestry bias between to cohorts.

#### Covariate Imputation:

Multiple imputation by chained equations was used to impute missing covariate data which was done using the mice V3.13.0 package in R. 56 individuals had missing zip-code based median income data, and 592 had missing elixhauser comorbidity scores which represented 21% of these data. 30 imputations were performed and combined using Rubin's approach.

#### ExWAS:

This analysis used sequencing data that was filtered using the above described QC and coverage harmonization. Within this analysis 805,347 variants were identified in the full cohort and following Hardy-Weinberg equilibrium test filtering using a mid-point P cut-off of  $1 \times 10^{-35}$ , 803,539 variants remained. The whole genome regression was performed in regenie using only common SNPs with a minor allele frequency (MAF)  $> 0.01$ . Variants with less than 5 minor alleles total were excluded as they were unable to reach statistical significance leaving 183,722 variants in the full cohort, 182,699 in the kidney failure subgroup and 181,261 in the FSGS subgroup. Association testing was performed using the approximate Firth likelihood ratio test with leave one chromosome out (LOCO) to account for the case-control imbalance present within this study.

#### Power Analysis:

Power analyses of the rare dominant gene-based collapsing models show a minimum of 6 QVs in cases per gene were required to reach significance corresponding to a detectable odds ratio of 64.8 for the full cohort, 72 for kidney failure, and 101 for FSGS at 80% power.

1. Li H, Durbin R. Fast and accurate short read alignment with Burrows–Wheeler transform. *Bioinformatics*. 2009 Jul 15;25(14):1754–60.
2. Auwera GAV der, O’Connor BD. *Genomics in the Cloud: Using Docker, GATK, and WDL in Terra*. 1st edition. Beijing Boston Farnham Sebastopol Tokyo: O’Reilly Media; 2020. 496 p.
3. Ren Z, Povysil G, Hostyk JA, Cui H, Bhardwaj N, Goldstein DB. ATAV: a comprehensive platform for population-scale genomic analyses. *BMC Bioinformatics*. 2021 Mar 23;22(1):149.
4. Petrovski S, Todd JL, Durham MT, Wang Q, Chien JW, Kelly FL, et al. An Exome Sequencing Study to Assess the Role of Rare Genetic Variation in Pulmonary Fibrosis. *Am J Respir Crit Care Med*. 2017 Jul 1;196(1):82–93.
5. Jun G, Flickinger M, Hetrick KN, Romm JM, Doheny KF, Abecasis GR, et al. Detecting and Estimating Contamination of Human DNA Samples in Sequencing and Array-Based Genotype Data. *Am J Hum Genet*. 2012 Nov 2;91(5):839–48.
6. Manichaikul A, Mychaleckyj JC, Rich SS, Daly K, Sale M, Chen WM. Robust relationship inference in genome-wide association studies. *Bioinformatics*. 2010 Nov 15;26(22):2867–73.
7. Povysil G, Chazara O, Carss KJ, Deevi SVV, Wang Q, Armisen J, et al. Assessing the Role of Rare Genetic Variation in Patients With Heart Failure. *JAMA Cardiol*. 2021 Apr;6(4):379–86.
